# Supplementary material for: Assortative mate preferences for height across short-term and long-term relationship contexts in a cross-cultural sample
Source: Front Psychol. 2022 Aug 25;13:937146. doi: 10.3389/fpsyg.2022.937146 (PMC9454610; doi:10.3389/fpsyg.2022.937146)
Supplement: Supplementary file 2 [file Data_Sheet_2.XLSX]

## Sheet: Data
ID_NUMBER	ID	Sex	Age	Height	Weight	Country	Nationality_selfreport	Preferredsex_selfreport	Relationship_context	HEIGHTpref_ORG	HEIGHTpref_CM
1	4385Ca	Male	19	177	56.5	Canada		PrefersOppositeSex	LongTerm	B	158
1	4385Ca	Male	19	177	56.5	Canada		PrefersOppositeSex	ShortTerm	C	163
2	4388Ca	Male	18	186.5	81.5	Canada		PrefersOppositeSex	LongTerm	E	173
2	4388Ca	Male	18	186.5	81.5	Canada		PrefersOppositeSex	ShortTerm	E	173
3	4443Ca	Male	18	179		Canada		PrefersOppositeSex	LongTerm	E	173
3	4443Ca	Male	18	179		Canada		PrefersOppositeSex	ShortTerm	B	158
4	4469Ca	Male	18	177	64.7	Canada		PrefersOppositeSex	LongTerm	D	168
4	4469Ca	Male	18	177	64.7	Canada		PrefersOppositeSex	ShortTerm	C	163
5	4486Ca	Male	19	181.5	86.4	Canada		PrefersOppositeSex	LongTerm	C	163
5	4486Ca	Male	19	181.5	86.4	Canada		PrefersOppositeSex	ShortTerm	D	168
6	4487Ca	Male	18	185	69.8	Canada		PrefersOppositeSex	LongTerm	D	168
6	4487Ca	Male	18	185	69.8	Canada		PrefersOppositeSex	ShortTerm	C	163
7	4488Ca	Male	18	178	90.6	Canada		PrefersOppositeSex	LongTerm	D	168
7	4488Ca	Male	18	178	90.6	Canada		PrefersOppositeSex	ShortTerm	C	163
8	4499Ca	Male	18	167		Canada		PrefersOppositeSex	LongTerm	C	163
8	4499Ca	Male	18	167		Canada		PrefersOppositeSex	ShortTerm	D	168
9	4504Ca	Male	18	187	66.1	Canada		PrefersOppositeSex	LongTerm	D	168
9	4504Ca	Male	18	187	66.1	Canada		PrefersOppositeSex	ShortTerm	C	163
10	4514Ca	Male	18	190	80	Canada		PrefersOppositeSex	LongTerm	E	173
10	4514Ca	Male	18	190	80	Canada		PrefersOppositeSex	ShortTerm	E	173
11	4519Ca	Male	19	173		Canada		PrefersOppositeSex	LongTerm	A	153
11	4519Ca	Male	19	173		Canada		PrefersOppositeSex	ShortTerm	A	153
12	4546Ca	Male	18	168	47.8	Canada		PrefersOppositeSex	LongTerm	C	163
12	4546Ca	Male	18	168	47.8	Canada		PrefersOppositeSex	ShortTerm	C	163
13	4566Ca	Male	19	185.4	71.21	Canada	8	PrefersOppositeSex	LongTerm	C	163
13	4566Ca	Male	19	185.4	71.21	Canada	8	PrefersOppositeSex	ShortTerm	D	168
14	4645Ca	Male	22	182.9	86.18	Canada	4	PrefersOppositeSex	LongTerm	D	168
14	4645Ca	Male	22	182.9	86.18	Canada	4	PrefersOppositeSex	ShortTerm	D	168
15	4675Ca	Male	18	188	83.91	Canada	4	PrefersOppositeSex	LongTerm	D	168
15	4675Ca	Male	18	188	83.91	Canada	4	PrefersOppositeSex	ShortTerm	C	163
16	4676Ca	Male	18	180.34	63.5	Canada	4	PrefersOppositeSex	LongTerm	C	163
16	4676Ca	Male	18	180.34	63.5	Canada	4	PrefersOppositeSex	ShortTerm	D	168
17	4678Ca	Male	17	182.9	79.38	Canada	4	PrefersOppositeSex	LongTerm	D	168
17	4678Ca	Male	17	182.9	79.38	Canada	4	PrefersOppositeSex	ShortTerm	D	168
18	4680Ca	Male	18	190.5	77.11	Canada	4	PrefersOppositeSex	LongTerm	D	168
18	4680Ca	Male	18	190.5	77.11	Canada	4	PrefersOppositeSex	ShortTerm	C	163
19	4682Ca	Male	18	175.3	48.99	Canada	4	PrefersOppositeSex	LongTerm	C	163
19	4682Ca	Male	18	175.3	48.99	Canada	4	PrefersOppositeSex	ShortTerm	C	163
20	4690Ca	Male	18	180.34	68.04	Canada	4	PrefersOppositeSex	LongTerm	E	173
20	4690Ca	Male	18	180.34	68.04	Canada	4	PrefersOppositeSex	ShortTerm	E	173
21	4697Ca	Male	19	180.34	88.45	Canada	4	PrefersOppositeSex	LongTerm	E	173
21	4697Ca	Male	19	180.34	88.45	Canada	4	PrefersOppositeSex	ShortTerm	C	163
22	4700Ca	Male	18	185.4	72.57	Canada	4	PrefersOppositeSex	LongTerm	E	173
22	4700Ca	Male	18	185.4	72.57	Canada	4	PrefersOppositeSex	ShortTerm	D	168
23	4666Ca	Male	28	185.4	92.99	Canada	4	PrefersSameSex	LongTerm	C	175
23	4666Ca	Male	28	185.4	92.99	Canada	4	PrefersSameSex	ShortTerm	C	175
24	4681Ca	Male	18	177.8	70.31	Canada	4	PrefersSameSex	LongTerm	D	180
24	4681Ca	Male	18	177.8	70.31	Canada	4	PrefersSameSex	ShortTerm	C	175
25	4591Ca	Male	18	182.9	60.78	Canada	4	PrefersEitherSex	LongTerm	D	168
25	4591Ca	Male	18	182.9	60.78	Canada	4	PrefersEitherSex	ShortTerm	D	168
26	4640Ca	Male	18	185.4	63.5	Canada	4	PreferNotToSay	LongTerm	D	168
26	4640Ca	Male	18	185.4	63.5	Canada	4	PreferNotToSay	ShortTerm	D	168
27	4646Ca	Male	18	180.34	73.94	Canada	12	PrefersOppositeSex	LongTerm	D	168
27	4646Ca	Male	18	180.34	73.94	Canada	12	PrefersOppositeSex	ShortTerm	D	168
28	4576Ca	Male	18	188	70.31	Canada	9	PrefersOppositeSex	LongTerm	D	168
28	4576Ca	Male	18	188	70.31	Canada	9	PrefersOppositeSex	ShortTerm	C	163
29	4677Ca	Male	18	180.34	63.5	Canada	6	PrefersOppositeSex	LongTerm
29	4677Ca	Male	18	180.34	63.5	Canada	6	PrefersOppositeSex	ShortTerm	B	158
30	4686Ca	Male	18	190.5	74.84	Canada	6	PrefersOppositeSex	LongTerm	B	158
30	4686Ca	Male	18	190.5	74.84	Canada	6	PrefersOppositeSex	ShortTerm	C	163
31	4698Ca	Male	18	177.8	70.76	Canada	6	PrefersOppositeSex	LongTerm	C	163
31	4698Ca	Male	18	177.8	70.76	Canada	6	PrefersOppositeSex	ShortTerm	C	163
32	4679Ca	Male	20	170.2	65.77	Canada	6	PrefersSameSex	LongTerm	D	180
32	4679Ca	Male	20	170.2	65.77	Canada	6	PrefersSameSex	ShortTerm	D	180
33	4699Ca	Male	21	160.1	58.97	Canada	6	PrefersEitherSex	LongTerm	C	163
33	4699Ca	Male	21	160.1	58.97	Canada	6	PrefersEitherSex	ShortTerm	B	158
34	4683Ca	Male	18	182.9	68.04	Canada	31	PrefersOppositeSex	LongTerm	D	168
34	4683Ca	Male	18	182.9	68.04	Canada	31	PrefersOppositeSex	ShortTerm	E	173
35	4585Ca	Male	18	172.7	73.48	Canada	5	PrefersOppositeSex	LongTerm	B	158
35	4585Ca	Male	18	172.7	73.48	Canada	5	PrefersOppositeSex	ShortTerm	D	168
36	4594Ca	Male	18	177.8	58.97	Canada	5	PrefersOppositeSex	LongTerm	D	168
36	4594Ca	Male	18	177.8	58.97	Canada	5	PrefersOppositeSex	ShortTerm	E	173
37	4612Ca	Male	18	180.34	99.79	Canada	5	PrefersOppositeSex	LongTerm	D	168
37	4612Ca	Male	18	180.34	99.79	Canada	5	PrefersOppositeSex	ShortTerm	C	163
38	4626Ca	Male	19	172.7	56.7	Canada	5	PrefersOppositeSex	LongTerm	D	168
38	4626Ca	Male	19	172.7	56.7	Canada	5	PrefersOppositeSex	ShortTerm	E	173
39	4639Ca	Male	18	177.8	74.84	Canada	5	PrefersOppositeSex	LongTerm	D	168
39	4639Ca	Male	18	177.8	74.84	Canada	5	PrefersOppositeSex	ShortTerm	A	153
40	4664Ca	Male	18	170.2	68.04	Canada	5	PrefersOppositeSex	LongTerm	C	163
40	4664Ca	Male	18	170.2	68.04	Canada	5	PrefersOppositeSex	ShortTerm	C	163
41	4665Ca	Male	18	175.3	58.97	Canada	5	PrefersEitherSex	LongTerm	C	163
41	4665Ca	Male	18	175.3	58.97	Canada	5	PrefersEitherSex	ShortTerm	B	158
42	4691Ca	Male	18	170.2	70.31	Canada	35	PrefersSameSex	LongTerm	C	175
42	4691Ca	Male	18	170.2	70.31	Canada	35	PrefersSameSex	ShortTerm	C	175
43	4693Ca	Male	18	165.1	66.68	Canada	38	PrefersOppositeSex	LongTerm	A	153
43	4693Ca	Male	18	165.1	66.68	Canada	38	PrefersOppositeSex	ShortTerm	A	153
44	4561Ca	Male	18	190.5	99.79	Canada	7	PrefersOppositeSex	LongTerm	E	173
44	4561Ca	Male	18	190.5	99.79	Canada	7	PrefersOppositeSex	ShortTerm	B	158
45	4644Ca	Male	18	172.7	58.97	Canada	7	PrefersOppositeSex	LongTerm	D	168
45	4644Ca	Male	18	172.7	58.97	Canada	7	PrefersOppositeSex	ShortTerm	D	168
46	4696Ca	Male	18	175.3	68.04	Canada	7	PrefersOppositeSex	LongTerm	D	168
46	4696Ca	Male	18	175.3	68.04	Canada	7	PrefersOppositeSex	ShortTerm	C	163
204	4581Ca	Female	18	157.5	52.16	Canada		PrefersOppositeSex	LongTerm	E	185
204	4581Ca	Female	18	157.5	52.16	Canada		PrefersOppositeSex	ShortTerm	C	175
205	4583Ca	Female	21	172.7	56.7	Canada		PrefersOppositeSex	LongTerm	D	180
205	4583Ca	Female	21	172.7	56.7	Canada		PrefersOppositeSex	ShortTerm	C	175
206	4692Ca	Female	17	162.6		Canada		PrefersOppositeSex	LongTerm	C	175
206	4692Ca	Female	17	162.6		Canada		PrefersOppositeSex	ShortTerm	D	180
207	4466Ca	Female	20	167.6	52.16	Canada	11	PrefersOppositeSex	LongTerm	D	180
207	4466Ca	Female	20	167.6	52.16	Canada	11	PrefersOppositeSex	ShortTerm	D	180
208	4689Ca	Female	18	160.1		Canada	11	PrefersOppositeSex	LongTerm	C	175
208	4689Ca	Female	18	160.1		Canada	11	PrefersOppositeSex	ShortTerm	C	175
209	4625Ca	Female	18	160.1	46.72	Canada	8	PrefersOppositeSex	LongTerm	D	180
209	4625Ca	Female	18	160.1	46.72	Canada	8	PrefersOppositeSex	ShortTerm	D	180
210	4651Ca	Female	24	177.8	65.32	Canada	8	PrefersOppositeSex	LongTerm	E	185
210	4651Ca	Female	24	177.8	65.32	Canada	8	PrefersOppositeSex	ShortTerm	E	185
211	4669Ca	Female	17	170.2	61.23	Canada	8	PrefersOppositeSex	LongTerm	E	185
211	4669Ca	Female	17	170.2	61.23	Canada	8	PrefersOppositeSex	ShortTerm	D	180
212	4515Ca	Female	18	165.1	93.44	Canada	8	PrefersEitherSex	LongTerm	E	185
212	4515Ca	Female	18	165.1	93.44	Canada	8	PrefersEitherSex	ShortTerm	D	180
213	4453Ca	Female	21	165.1	65.77	Canada	4	PrefersOppositeSex	LongTerm	E	185
213	4453Ca	Female	21	165.1	65.77	Canada	4	PrefersOppositeSex	ShortTerm	E	185
214	4461Ca	Female	29	170.2	61.69	Canada	4	PrefersOppositeSex	LongTerm	D	180
214	4461Ca	Female	29	170.2	61.69	Canada	4	PrefersOppositeSex	ShortTerm	E	185
215	4465Ca	Female	19	175.3	52.16	Canada	4	PrefersOppositeSex	LongTerm	D	180
215	4465Ca	Female	19	175.3	52.16	Canada	4	PrefersOppositeSex	ShortTerm	C	175
216	4468Ca	Female	18	162.6	63.5	Canada	4	PrefersOppositeSex	LongTerm	C	175
216	4468Ca	Female	18	162.6	63.5	Canada	4	PrefersOppositeSex	ShortTerm	C	175
217	4470Ca	Female	19	160.1	58.97	Canada	4	PrefersOppositeSex	LongTerm	E	185
217	4470Ca	Female	19	160.1	58.97	Canada	4	PrefersOppositeSex	ShortTerm	E	185
218	4471Ca	Female	18	162.6	52.16	Canada	4	PrefersOppositeSex	LongTerm	D	180
218	4471Ca	Female	18	162.6	52.16	Canada	4	PrefersOppositeSex	ShortTerm	D	180
219	4474Ca	Female	17	157.5	63.5	Canada	4	PrefersOppositeSex	LongTerm	D	180
219	4474Ca	Female	17	157.5	63.5	Canada	4	PrefersOppositeSex	ShortTerm	E	185
220	4480Ca	Female	18	175.3	54.43	Canada	4	PrefersOppositeSex	LongTerm	E	185
220	4480Ca	Female	18	175.3	54.43	Canada	4	PrefersOppositeSex	ShortTerm	E	185
221	4484Ca	Female	18	175.3	61.23	Canada	4	PrefersOppositeSex	LongTerm	E	185
221	4484Ca	Female	18	175.3	61.23	Canada	4	PrefersOppositeSex	ShortTerm	E	185
222	4485Ca	Female	20	167.6	58.97	Canada	4	PrefersOppositeSex	LongTerm	D	180
222	4485Ca	Female	20	167.6	58.97	Canada	4	PrefersOppositeSex	ShortTerm	E	185
223	4489Ca	Female	18	170.2		Canada	4	PrefersOppositeSex	LongTerm	E	185
223	4489Ca	Female	18	170.2		Canada	4	PrefersOppositeSex	ShortTerm	D	180
224	4495Ca	Female	18	154.9	47.63	Canada	4	PrefersOppositeSex	LongTerm	D	180
224	4495Ca	Female	18	154.9	47.63	Canada	4	PrefersOppositeSex	ShortTerm	D	180
225	4496Ca	Female	18	162.6	63.5	Canada	4	PrefersOppositeSex	LongTerm	D	180
225	4496Ca	Female	18	162.6	63.5	Canada	4	PrefersOppositeSex	ShortTerm	B	170
226	4498Ca	Female	24	172.7	72.57	Canada	4	PrefersOppositeSex	LongTerm	D	180
226	4498Ca	Female	24	172.7	72.57	Canada	4	PrefersOppositeSex	ShortTerm	D	180
227	4503Ca	Female	20	167.6	54.43	Canada	4	PrefersOppositeSex	LongTerm	B	170
227	4503Ca	Female	20	167.6	54.43	Canada	4	PrefersOppositeSex	ShortTerm	D	180
228	4508Ca	Female	24	175.3	63.5	Canada	4	PrefersOppositeSex	LongTerm	E	185
228	4508Ca	Female	24	175.3	63.5	Canada	4	PrefersOppositeSex	ShortTerm	E	185
229	4509Ca	Female	18	170.2	58.97	Canada	4	PrefersOppositeSex	LongTerm	E	185
229	4509Ca	Female	18	170.2	58.97	Canada	4	PrefersOppositeSex	ShortTerm	E	185
230	4510Ca	Female	18	170.2	63.5	Canada	4	PrefersOppositeSex	LongTerm	E	185
230	4510Ca	Female	18	170.2	63.5	Canada	4	PrefersOppositeSex	ShortTerm	E	185
231	4512Ca	Female	18	170.2	58.97	Canada	4	PrefersOppositeSex	LongTerm	D	180
231	4512Ca	Female	18	170.2	58.97	Canada	4	PrefersOppositeSex	ShortTerm	D	180
232	4521Ca	Female	18	165.1	70.76	Canada	4	PrefersOppositeSex	LongTerm	D	180
232	4521Ca	Female	18	165.1	70.76	Canada	4	PrefersOppositeSex	ShortTerm	E	185
233	4529Ca	Female	18	152.4	48.53	Canada	4	PrefersOppositeSex	LongTerm	D	180
233	4529Ca	Female	18	152.4	48.53	Canada	4	PrefersOppositeSex	ShortTerm	E	185
234	4530Ca	Female	18	177.8	88.45	Canada	4	PrefersOppositeSex	LongTerm	E	185
234	4530Ca	Female	18	177.8	88.45	Canada	4	PrefersOppositeSex	ShortTerm	D	180
235	4531Ca	Female	18	170.2	52.16	Canada	4	PrefersOppositeSex	LongTerm	B	170
235	4531Ca	Female	18	170.2	52.16	Canada	4	PrefersOppositeSex	ShortTerm	D	180
236	4550Ca	Female	18	152.4	38.56	Canada	4	PrefersOppositeSex	LongTerm	D	180
236	4550Ca	Female	18	152.4	38.56	Canada	4	PrefersOppositeSex	ShortTerm	B	170
237	4552Ca	Female	19	175.3	62.6	Canada	4	PrefersOppositeSex	LongTerm	E	185
237	4552Ca	Female	19	175.3	62.6	Canada	4	PrefersOppositeSex	ShortTerm	E	185
238	4555Ca	Female	17	162.6	58.97	Canada	4	PrefersOppositeSex	LongTerm	D	180
238	4555Ca	Female	17	162.6	58.97	Canada	4	PrefersOppositeSex	ShortTerm	E	185
239	4556Ca	Female	18	180.34	68.04	Canada	4	PrefersOppositeSex	LongTerm	E	185
239	4556Ca	Female	18	180.34	68.04	Canada	4	PrefersOppositeSex	ShortTerm	E	185
240	4560Ca	Female	18	160.1	44.91	Canada	4	PrefersOppositeSex	LongTerm	D	180
240	4560Ca	Female	18	160.1	44.91	Canada	4	PrefersOppositeSex	ShortTerm	C	175
241	4562Ca	Female	18	167.6	74.84	Canada	4	PrefersOppositeSex	LongTerm	E	185
241	4562Ca	Female	18	167.6	74.84	Canada	4	PrefersOppositeSex	ShortTerm	E	185
242	4568Ca	Female	18	167.6	49.9	Canada	4	PrefersOppositeSex	LongTerm	D	180
242	4568Ca	Female	18	167.6	49.9	Canada	4	PrefersOppositeSex	ShortTerm	D	180
243	4570Ca	Female	17	180.34	58.97	Canada	4	PrefersOppositeSex	LongTerm	E	185
243	4570Ca	Female	17	180.34	58.97	Canada	4	PrefersOppositeSex	ShortTerm	E	185
244	4571Ca	Female	18	162.6	49.9	Canada	4	PrefersOppositeSex	LongTerm	D	180
244	4571Ca	Female	18	162.6	49.9	Canada	4	PrefersOppositeSex	ShortTerm	D	180
245	4573Ca	Female	19	157.5	53.07	Canada	4	PrefersOppositeSex	LongTerm	D	180
245	4573Ca	Female	19	157.5	53.07	Canada	4	PrefersOppositeSex	ShortTerm	D	180
246	4577Ca	Female	18	172.7	68.95	Canada	4	PrefersOppositeSex	LongTerm	E	185
246	4577Ca	Female	18	172.7	68.95	Canada	4	PrefersOppositeSex	ShortTerm	E	185
247	4578Ca	Female	20	162.6	90.72	Canada	4	PrefersOppositeSex	LongTerm	E	185
247	4578Ca	Female	20	162.6	90.72	Canada	4	PrefersOppositeSex	ShortTerm	E	185
248	4579Ca	Female	18	167.6	58.06	Canada	4	PrefersOppositeSex	LongTerm	E	185
248	4579Ca	Female	18	167.6	58.06	Canada	4	PrefersOppositeSex	ShortTerm	E	185
249	4580Ca	Female	18	160.1	55.79	Canada	4	PrefersOppositeSex	LongTerm	E	185
249	4580Ca	Female	18	160.1	55.79	Canada	4	PrefersOppositeSex	ShortTerm	D	180
250	4582Ca	Female	24	165.1	68.49	Canada	4	PrefersOppositeSex	LongTerm	C	175
250	4582Ca	Female	24	165.1	68.49	Canada	4	PrefersOppositeSex	ShortTerm	E	185
251	4584Ca	Female	19	152.4	54.43	Canada	4	PrefersOppositeSex	LongTerm	D	180
251	4584Ca	Female	19	152.4	54.43	Canada	4	PrefersOppositeSex	ShortTerm	B	170
252	4609Ca	Female	18	165.1	68.04	Canada	4	PrefersOppositeSex	LongTerm	D	180
252	4609Ca	Female	18	165.1	68.04	Canada	4	PrefersOppositeSex	ShortTerm	D	180
253	4623Ca	Female	26	162.6	52.16	Canada	4	PrefersOppositeSex	LongTerm	E	185
253	4623Ca	Female	26	162.6	52.16	Canada	4	PrefersOppositeSex	ShortTerm	D	180
254	4624Ca	Female	18	154.9	45.81	Canada	4	PrefersOppositeSex	LongTerm	E	185
254	4624Ca	Female	18	154.9	45.81	Canada	4	PrefersOppositeSex	ShortTerm	D	180
255	4633Ca	Female	18	170.2	67.13	Canada	4	PrefersOppositeSex	LongTerm	E	185
255	4633Ca	Female	18	170.2	67.13	Canada	4	PrefersOppositeSex	ShortTerm	E	185
256	4643Ca	Female	17	177.8	67.13	Canada	4	PrefersOppositeSex	LongTerm	E	185
256	4643Ca	Female	17	177.8	67.13	Canada	4	PrefersOppositeSex	ShortTerm	D	180
257	4648Ca	Female	20	165.1	61.69	Canada	4	PrefersOppositeSex	LongTerm	C	175
257	4648Ca	Female	20	165.1	61.69	Canada	4	PrefersOppositeSex	ShortTerm	C	175
258	4649Ca	Female	17	165.1	58.97	Canada	4	PrefersOppositeSex	LongTerm	E	185
258	4649Ca	Female	17	165.1	58.97	Canada	4	PrefersOppositeSex	ShortTerm	D	180
259	4650Ca	Female	18	172.7	61.23	Canada	4	PrefersOppositeSex	LongTerm	E	185
259	4650Ca	Female	18	172.7	61.23	Canada	4	PrefersOppositeSex	ShortTerm	E	185
260	4668Ca	Female	18	170.2	55.79	Canada	4	PrefersOppositeSex	LongTerm	E	185
260	4668Ca	Female	18	170.2	55.79	Canada	4	PrefersOppositeSex	ShortTerm	E	185
261	4670Ca	Female	24	157.5	63.5	Canada	4	PrefersOppositeSex	LongTerm	D	180
261	4670Ca	Female	24	157.5	63.5	Canada	4	PrefersOppositeSex	ShortTerm	D	180
262	4671Ca	Female	20	162.6	52.16	Canada	4	PrefersOppositeSex	LongTerm	D	180
262	4671Ca	Female	20	162.6	52.16	Canada	4	PrefersOppositeSex	ShortTerm	E	185
263	4674Ca	Female	18	165.1	51.71	Canada	4	PrefersOppositeSex	LongTerm	E	185
263	4674Ca	Female	18	165.1	51.71	Canada	4	PrefersOppositeSex	ShortTerm	E	185
264	4684Ca	Female	19	167.6	63.5	Canada	4	PrefersOppositeSex	LongTerm	D	180
264	4684Ca	Female	19	167.6	63.5	Canada	4	PrefersOppositeSex	ShortTerm	D	180
265	4685Ca	Female	18	175.3	63.5	Canada	4	PrefersOppositeSex	LongTerm	E	185
265	4685Ca	Female	18	175.3	63.5	Canada	4	PrefersOppositeSex	ShortTerm	E	185
266	4687Ca	Female	21	154.9	65.77	Canada	4	PrefersOppositeSex	LongTerm	E	185
266	4687Ca	Female	21	154.9	65.77	Canada	4	PrefersOppositeSex	ShortTerm	D	180
267	4702Ca	Female	21	157.5	74.84	Canada	4	PrefersOppositeSex	LongTerm	C	175
267	4702Ca	Female	21	157.5	74.84	Canada	4	PrefersOppositeSex	ShortTerm	D	180
268	4673Ca	Female	23	180	90.72	Canada	4	PrefersSameSex	LongTerm	E	173
268	4673Ca	Female	23	180	90.72	Canada	4	PrefersSameSex	ShortTerm	E	173
269	4545Ca	Female	18	160.1	95.25	Canada	4	PrefersEitherSex	LongTerm	A	165
269	4545Ca	Female	18	160.1	95.25	Canada	4	PrefersEitherSex	ShortTerm	A	165
270	4575Ca	Female	28	180.34	98.88	Canada	4	PrefersEitherSex	LongTerm	E	185
270	4575Ca	Female	28	180.34	98.88	Canada	4	PrefersEitherSex	ShortTerm	D	180
271	4634Ca	Female	23	180.34	92.53	Canada	4	PrefersEitherSex	LongTerm	E	185
271	4634Ca	Female	23	180.34	92.53	Canada	4	PrefersEitherSex	ShortTerm	D	180
272	4631Ca	Female	18	162.6	68.04	Canada	23	PrefersSameSex	LongTerm	D	168
272	4631Ca	Female	18	162.6	68.04	Canada	23	PrefersSameSex	ShortTerm	B	158
273	4592Ca	Female	17	160.1	45.36	Canada	24	PrefersOppositeSex	LongTerm	C	175
273	4592Ca	Female	17	160.1	45.36	Canada	24	PrefersOppositeSex	ShortTerm	B	170
274	4520Ca	Female	18	160.1	63.5	Canada	9	PrefersOppositeSex	LongTerm	D	180
274	4520Ca	Female	18	160.1	63.5	Canada	9	PrefersOppositeSex	ShortTerm	D	180
275	4524Ca	Female	19	167.6	58.97	Canada	9	PrefersOppositeSex	LongTerm	D	180
275	4524Ca	Female	19	167.6	58.97	Canada	9	PrefersOppositeSex	ShortTerm	C	175
276	4672Ca	Female	18	162.6	58.97	Canada	9	PrefersOppositeSex	LongTerm	E	185
276	4672Ca	Female	18	162.6	58.97	Canada	9	PrefersOppositeSex	ShortTerm	D	180
277	4467Ca	Female	22	162.6	68.04	Canada	27	PrefersOppositeSex	LongTerm	E	185
277	4467Ca	Female	22	162.6	68.04	Canada	27	PrefersOppositeSex	ShortTerm	D	180
278	4632Ca	Female	18	162.6	48.08	Canada	29	PrefersOppositeSex	LongTerm	D	180
278	4632Ca	Female	18	162.6	48.08	Canada	29	PrefersOppositeSex	ShortTerm	D	180
279	4464Ca	Female	18	165.1	52.16	Canada	6	PrefersOppositeSex	LongTerm	E	185
279	4464Ca	Female	18	165.1	52.16	Canada	6	PrefersOppositeSex	ShortTerm	E	185
280	4522Ca	Female	17	160.1	47.63	Canada	6	PrefersOppositeSex	LongTerm	B	170
280	4522Ca	Female	17	160.1	47.63	Canada	6	PrefersOppositeSex	ShortTerm	C	175
281	4569Ca	Female	20	190.5	54.43	Canada	6	PrefersOppositeSex	LongTerm	D	180
281	4569Ca	Female	20	190.5	54.43	Canada	6	PrefersOppositeSex	ShortTerm	D	180
282	4593Ca	Female	18	154.9	47.17	Canada	6	PrefersOppositeSex	LongTerm	D	180
282	4593Ca	Female	18	154.9	47.17	Canada	6	PrefersOppositeSex	ShortTerm	C	175
283	4629Ca	Female	18	154.9	51.26	Canada	6	PrefersOppositeSex	LongTerm	B	170
283	4629Ca	Female	18	154.9	51.26	Canada	6	PrefersOppositeSex	ShortTerm	B	170
284	4642Ca	Female	18	149.9	49.9	Canada	6	PrefersOppositeSex	LongTerm	C	175
284	4642Ca	Female	18	149.9	49.9	Canada	6	PrefersOppositeSex	ShortTerm	B	170
285	4694Ca	Female	18	162.6	48.99	Canada	6	PrefersOppositeSex	LongTerm	D	180
285	4694Ca	Female	18	162.6	48.99	Canada	6	PrefersOppositeSex	ShortTerm	D	180
286	4543Ca	Female	18	157.5	52.16	Canada	6	PrefersEitherSex	LongTerm	D	180
286	4543Ca	Female	18	157.5	52.16	Canada	6	PrefersEitherSex	ShortTerm	C	175
287	4572Ca	Female	18	160.1	72.57	Canada	6	PrefersEitherSex	LongTerm	D	180
287	4572Ca	Female	18	160.1	72.57	Canada	6	PrefersEitherSex	ShortTerm	D	180
288	4599Ca	Female	18	160.1	54.43	Canada	34	PrefersOppositeSex	LongTerm	E	185
288	4599Ca	Female	18	160.1	54.43	Canada	34	PrefersOppositeSex	ShortTerm	D	180
289	4497Ca	Female	19	160.1	61.23	Canada	5	PrefersOppositeSex	LongTerm	D	180
289	4497Ca	Female	19	160.1	61.23	Canada	5	PrefersOppositeSex	ShortTerm	C	175
290	4516Ca	Female	18	165.1	58.97	Canada	5	PrefersOppositeSex	LongTerm	E	185
290	4516Ca	Female	18	165.1	58.97	Canada	5	PrefersOppositeSex	ShortTerm	E	185
291	4525Ca	Female	18	167.6	55.34	Canada	5	PrefersOppositeSex	LongTerm	D	180
291	4525Ca	Female	18	167.6	55.34	Canada	5	PrefersOppositeSex	ShortTerm	E	185
292	4598Ca	Female	18	157.5		Canada	5	PrefersOppositeSex	LongTerm	C	175
292	4598Ca	Female	18	157.5		Canada	5	PrefersOppositeSex	ShortTerm	B	170
293	4627Ca	Female	18	152.4	65.77	Canada	5	PrefersOppositeSex	LongTerm	D	180
293	4627Ca	Female	18	152.4	65.77	Canada	5	PrefersOppositeSex	ShortTerm	E	185
294	4628Ca	Female	18	162.6	62.14	Canada	5	PrefersOppositeSex	LongTerm	D	180
294	4628Ca	Female	18	162.6	62.14	Canada	5	PrefersOppositeSex	ShortTerm	E	185
295	4630Ca	Female	18	160.1	58.51	Canada	5	PrefersSameSex	LongTerm	D	168
295	4630Ca	Female	18	160.1	58.51	Canada	5	PrefersSameSex	ShortTerm	E	173
296	4695Ca	Female	20	150		Canada	5	PreferNotToSay	LongTerm	A	165
296	4695Ca	Female	20	150		Canada	5	PreferNotToSay	ShortTerm	A	165
297	4544Ca	Female	19	160.1	48.53	Canada	14	PrefersOppositeSex	LongTerm	D	180
297	4544Ca	Female	19	160.1	48.53	Canada	14	PrefersOppositeSex	ShortTerm	D	180
298	4507Ca	Female	20	167.6	45.36	Canada	7	PrefersOppositeSex	LongTerm	D	180
298	4507Ca	Female	20	167.6	45.36	Canada	7	PrefersOppositeSex	ShortTerm	D	180
299	4513Ca	Female	18	162.6	50.8	Canada	7	PrefersOppositeSex	LongTerm	C	175
299	4513Ca	Female	18	162.6	50.8	Canada	7	PrefersOppositeSex	ShortTerm	C	175
300	4523Ca	Female	18	160.1	56.7	Canada	7	PrefersOppositeSex	LongTerm	D	180
300	4523Ca	Female	18	160.1	56.7	Canada	7	PrefersOppositeSex	ShortTerm	D	180
47	14C	Male	21	180	72	Cuba	1	PrefersOppositeSex	LongTerm	D	168
47	14C	Male	21	180	72	Cuba	1	PrefersOppositeSex	ShortTerm	E	173
48	15C	Male	21	168	59	Cuba	1	PrefersOppositeSex	LongTerm	D	168
48	15C	Male	21	168	59	Cuba	1	PrefersOppositeSex	ShortTerm	D	168
49	16C	Male	26	175	59	Cuba	1	PrefersOppositeSex	LongTerm	C	163
49	16C	Male	26	175	59	Cuba	1	PrefersOppositeSex	ShortTerm
50	18C	Male	22	168	55	Cuba	1	PrefersOppositeSex	LongTerm	D	168
50	18C	Male	22	168	55	Cuba	1	PrefersOppositeSex	ShortTerm	D	168
51	19C	Male	26	185	85	Cuba	1	PrefersOppositeSex	LongTerm	E	173
51	19C	Male	26	185	85	Cuba	1	PrefersOppositeSex	ShortTerm	D	168
52	24C	Male	19	183	73	Cuba	1	PrefersOppositeSex	LongTerm	D	168
52	24C	Male	19	183	73	Cuba	1	PrefersOppositeSex	ShortTerm	D	168
53	28C	Male	23	160	65	Cuba	1	PrefersOppositeSex	LongTerm	A	153
53	28C	Male	23	160	65	Cuba	1	PrefersOppositeSex	ShortTerm	A	153
54	41C	Male	19	177	78	Cuba	1	PrefersOppositeSex	LongTerm	E	173
54	41C	Male	19	177	78	Cuba	1	PrefersOppositeSex	ShortTerm	C	163
55	42C	Male	24	180	75	Cuba	1	PrefersOppositeSex	LongTerm	B	158
55	42C	Male	24	180	75	Cuba	1	PrefersOppositeSex	ShortTerm	B	158
56	47C	Male	22	186	72	Cuba	1	PrefersOppositeSex	LongTerm	C	163
56	47C	Male	22	186	72	Cuba	1	PrefersOppositeSex	ShortTerm	C	163
57	51C	Male	20	163	55	Cuba	1	PrefersOppositeSex	LongTerm	C	163
57	51C	Male	20	163	55	Cuba	1	PrefersOppositeSex	ShortTerm	A	153
58	52C	Male	19	176	56	Cuba	1	PrefersOppositeSex	LongTerm	A	153
58	52C	Male	19	176	56	Cuba	1	PrefersOppositeSex	ShortTerm	D	168
59	53C	Male	22	175	50	Cuba	1	PrefersOppositeSex	LongTerm	B	158
59	53C	Male	22	175	50	Cuba	1	PrefersOppositeSex	ShortTerm	B	158
60	58C	Male	21	174	77	Cuba	1	PrefersOppositeSex	LongTerm	D	168
60	58C	Male	21	174	77	Cuba	1	PrefersOppositeSex	ShortTerm	C	163
61	63C	Male	23	181	77	Cuba	1	PrefersOppositeSex	LongTerm	E	173
61	63C	Male	23	181	77	Cuba	1	PrefersOppositeSex	ShortTerm	E	173
62	67C	Male	25	180	86	Cuba	1	PrefersOppositeSex	LongTerm	B	158
62	67C	Male	25	180	86	Cuba	1	PrefersOppositeSex	ShortTerm	C	163
63	68C	Male	21	171	68	Cuba	1	PrefersOppositeSex	LongTerm	B	158
63	68C	Male	21	171	68	Cuba	1	PrefersOppositeSex	ShortTerm	E	173
64	78C	Male	26	171	70	Cuba	1	PrefersOppositeSex	LongTerm	D	168
64	78C	Male	26	171	70	Cuba	1	PrefersOppositeSex	ShortTerm	A	153
65	80C	Male	22	178	62	Cuba	1	PrefersOppositeSex	LongTerm	E	173
65	80C	Male	22	178	62	Cuba	1	PrefersOppositeSex	ShortTerm	B	158
66	81C	Male	23	178	65	Cuba	1	PrefersOppositeSex	LongTerm	C	163
66	81C	Male	23	178	65	Cuba	1	PrefersOppositeSex	ShortTerm	C	163
67	83C	Male	19	182	57	Cuba	1	PrefersOppositeSex	LongTerm	D	168
67	83C	Male	19	182	57	Cuba	1	PrefersOppositeSex	ShortTerm	C	163
68	84C	Male	19	175	60	Cuba	1	PrefersOppositeSex	LongTerm	D	168
68	84C	Male	19	175	60	Cuba	1	PrefersOppositeSex	ShortTerm	C	163
69	85C	Male	19	162	52	Cuba	1	PrefersOppositeSex	LongTerm	C	163
69	85C	Male	19	162	52	Cuba	1	PrefersOppositeSex	ShortTerm	C	163
70	86C	Male	20	169	60	Cuba	1	PrefersOppositeSex	LongTerm	B	158
70	86C	Male	20	169	60	Cuba	1	PrefersOppositeSex	ShortTerm	B	158
71	87C	Male	19	190	75	Cuba	1	PrefersOppositeSex	LongTerm	E	173
71	87C	Male	19	190	75	Cuba	1	PrefersOppositeSex	ShortTerm	E	173
72	88C	Male	19	181	80	Cuba	1	PrefersOppositeSex	LongTerm	A	153
72	88C	Male	19	181	80	Cuba	1	PrefersOppositeSex	ShortTerm	B	158
73	89C	Male	19	183	65	Cuba	1	PrefersOppositeSex	LongTerm	B	158
73	89C	Male	19	183	65	Cuba	1	PrefersOppositeSex	ShortTerm	D	168
74	90C	Male	19	171	73	Cuba	1	PrefersOppositeSex	LongTerm	A	153
74	90C	Male	19	171	73	Cuba	1	PrefersOppositeSex	ShortTerm	A	153
75	92C	Male	19	180	70	Cuba	1	PrefersOppositeSex	LongTerm	B	158
75	92C	Male	19	180	70	Cuba	1	PrefersOppositeSex	ShortTerm	A	153
76	93C	Male	22	185	70	Cuba	1	PrefersOppositeSex	LongTerm	C	163
76	93C	Male	22	185	70	Cuba	1	PrefersOppositeSex	ShortTerm	D	168
77	94C	Male	21	170	65	Cuba	1	PrefersOppositeSex	LongTerm	C	163
77	94C	Male	21	170	65	Cuba	1	PrefersOppositeSex	ShortTerm	C	163
78	96C	Male	21	170	67	Cuba	1	PrefersOppositeSex	LongTerm	C	163
78	96C	Male	21	170	67	Cuba	1	PrefersOppositeSex	ShortTerm	C	163
79	99C	Male	23	180	65	Cuba	1	PrefersOppositeSex	LongTerm	D	168
79	99C	Male	23	180	65	Cuba	1	PrefersOppositeSex	ShortTerm	E	173
80	101C	Male	21	184	60	Cuba	1	PrefersOppositeSex	LongTerm	E	173
80	101C	Male	21	184	60	Cuba	1	PrefersOppositeSex	ShortTerm	E	173
81	102C	Male	20	170	55	Cuba	1	PrefersOppositeSex	LongTerm	B	158
81	102C	Male	20	170	55	Cuba	1	PrefersOppositeSex	ShortTerm	B	158
82	106C	Male	20	182	110	Cuba	1	PrefersOppositeSex	LongTerm	D	168
82	106C	Male	20	182	110	Cuba	1	PrefersOppositeSex	ShortTerm	C	163
83	109C	Male	19	178	65	Cuba	1	PrefersOppositeSex	LongTerm	D	168
83	109C	Male	19	178	65	Cuba	1	PrefersOppositeSex	ShortTerm	D	168
84	112C	Male	22	165	65	Cuba	1	PrefersOppositeSex	LongTerm	D	168
84	112C	Male	22	165	65	Cuba	1	PrefersOppositeSex	ShortTerm	D	168
85	113C	Male	21	185	66	Cuba	1	PrefersOppositeSex	LongTerm	B	158
85	113C	Male	21	185	66	Cuba	1	PrefersOppositeSex	ShortTerm	A	153
86	114C	Male	24	180	74	Cuba	1	PrefersOppositeSex	LongTerm	C	163
86	114C	Male	24	180	74	Cuba	1	PrefersOppositeSex	ShortTerm
87	115C	Male	23	184	68	Cuba	1	PrefersOppositeSex	LongTerm	D	168
87	115C	Male	23	184	68	Cuba	1	PrefersOppositeSex	ShortTerm	E	173
88	116C	Male	24	185	65	Cuba	1	PrefersOppositeSex	LongTerm	C	163
88	116C	Male	24	185	65	Cuba	1	PrefersOppositeSex	ShortTerm	C	163
89	117C	Male	25	163	50	Cuba	1	PrefersOppositeSex	LongTerm	B	158
89	117C	Male	25	163	50	Cuba	1	PrefersOppositeSex	ShortTerm	B	158
90	118C	Male	19	165	50	Cuba	1	PrefersOppositeSex	LongTerm	E	173
90	118C	Male	19	165	50	Cuba	1	PrefersOppositeSex	ShortTerm	E	173
91	119C	Male	22	185	70	Cuba	1	PrefersOppositeSex	LongTerm	D	168
91	119C	Male	22	185	70	Cuba	1	PrefersOppositeSex	ShortTerm	D	168
92	120C	Male	21	176	68	Cuba	1	PrefersOppositeSex	LongTerm	C	163
92	120C	Male	21	176	68	Cuba	1	PrefersOppositeSex	ShortTerm	B	158
93	122C	Male	23	178	66	Cuba	1	PrefersOppositeSex	LongTerm	E	173
93	122C	Male	23	178	66	Cuba	1	PrefersOppositeSex	ShortTerm
94	125C	Male	25	184	89	Cuba	1	PrefersOppositeSex	LongTerm	E	173
94	125C	Male	25	184	89	Cuba	1	PrefersOppositeSex	ShortTerm	C	163
95	127C	Male	25	180	82	Cuba	1	PrefersOppositeSex	LongTerm	D	168
95	127C	Male	25	180	82	Cuba	1	PrefersOppositeSex	ShortTerm	D	168
96	128C	Male	27	164	50	Cuba	1	PrefersOppositeSex	LongTerm	B	158
96	128C	Male	27	164	50	Cuba	1	PrefersOppositeSex	ShortTerm	B	158
97	133C	Male	30	172	70	Cuba	1	PrefersOppositeSex	LongTerm	C	163
97	133C	Male	30	172	70	Cuba	1	PrefersOppositeSex	ShortTerm	B	158
98	135C	Male	25	175	60	Cuba	1	PrefersOppositeSex	LongTerm	C	163
98	135C	Male	25	175	60	Cuba	1	PrefersOppositeSex	ShortTerm	C	163
99	136C	Male	26	179	75	Cuba	1	PrefersOppositeSex	LongTerm	E	173
99	136C	Male	26	179	75	Cuba	1	PrefersOppositeSex	ShortTerm	B	158
100	138C	Male	31	175	66	Cuba	1	PrefersOppositeSex	LongTerm	C	163
100	138C	Male	31	175	66	Cuba	1	PrefersOppositeSex	ShortTerm	C	163
101	139C	Male	26	171	71	Cuba	1	PrefersOppositeSex	LongTerm	B	158
101	139C	Male	26	171	71	Cuba	1	PrefersOppositeSex	ShortTerm	B	158
102	140C	Male	28	172	69	Cuba	1	PrefersOppositeSex	LongTerm	C	163
102	140C	Male	28	172	69	Cuba	1	PrefersOppositeSex	ShortTerm	C	163
103	141C	Male	25	188	69	Cuba	1	PrefersOppositeSex	LongTerm	E	173
103	141C	Male	25	188	69	Cuba	1	PrefersOppositeSex	ShortTerm	D	168
104	147C	Male	25	170	70	Cuba	1	PrefersOppositeSex	LongTerm	D	168
104	147C	Male	25	170	70	Cuba	1	PrefersOppositeSex	ShortTerm	D	168
105	148C	Male	27	180	95	Cuba	1	PrefersOppositeSex	LongTerm	B	158
105	148C	Male	27	180	95	Cuba	1	PrefersOppositeSex	ShortTerm	D	168
106	149C	Male	29	173	100	Cuba	1	PrefersOppositeSex	LongTerm	D	168
106	149C	Male	29	173	100	Cuba	1	PrefersOppositeSex	ShortTerm	E	173
107	151C	Male	27	187	85	Cuba	1	PrefersOppositeSex	LongTerm	E	173
107	151C	Male	27	187	85	Cuba	1	PrefersOppositeSex	ShortTerm	E	173
108	154C	Male	26	170	70	Cuba	1	PrefersOppositeSex	LongTerm	C	163
108	154C	Male	26	170	70	Cuba	1	PrefersOppositeSex	ShortTerm	C	163
109	155C	Male	25	180	80	Cuba	1	PrefersOppositeSex	LongTerm	C	163
109	155C	Male	25	180	80	Cuba	1	PrefersOppositeSex	ShortTerm	B	158
110	156C	Male	29	180	95	Cuba	1	PrefersOppositeSex	LongTerm	E	173
110	156C	Male	29	180	95	Cuba	1	PrefersOppositeSex	ShortTerm	D	168
111	157C	Male	28	179	100	Cuba	1	PrefersOppositeSex	LongTerm	D	168
111	157C	Male	28	179	100	Cuba	1	PrefersOppositeSex	ShortTerm	D	168
112	161C	Male	26	168	80	Cuba	1	PrefersOppositeSex	LongTerm	C	163
112	161C	Male	26	168	80	Cuba	1	PrefersOppositeSex	ShortTerm	C	163
113	166C	Male	32	165	78	Cuba	1	PrefersOppositeSex	LongTerm	D	168
113	166C	Male	32	165	78	Cuba	1	PrefersOppositeSex	ShortTerm	E	173
114	167C	Male	31	174	68	Cuba	1	PrefersOppositeSex	LongTerm	C	163
114	167C	Male	31	174	68	Cuba	1	PrefersOppositeSex	ShortTerm	C	163
115	168C	Male	25	162	62	Cuba	1	PrefersOppositeSex	LongTerm	A	153
115	168C	Male	25	162	62	Cuba	1	PrefersOppositeSex	ShortTerm	A	153
116	170C	Male	26	173	80	Cuba	1	PrefersOppositeSex	LongTerm	C	163
116	170C	Male	26	173	80	Cuba	1	PrefersOppositeSex	ShortTerm	E	173
117	171C	Male	22	182	83	Cuba	1	PrefersOppositeSex	LongTerm	D	168
117	171C	Male	22	182	83	Cuba	1	PrefersOppositeSex	ShortTerm	C	163
118	173C	Male	22	169	65	Cuba	1	PrefersOppositeSex	LongTerm	D	168
118	173C	Male	22	169	65	Cuba	1	PrefersOppositeSex	ShortTerm	C	163
119	176C	Male	21	180	70	Cuba	1	PrefersOppositeSex	LongTerm	D	168
119	176C	Male	21	180	70	Cuba	1	PrefersOppositeSex	ShortTerm	C	163
120	180C	Male	23	171	64	Cuba	1	PrefersOppositeSex	LongTerm	C	163
120	180C	Male	23	171	64	Cuba	1	PrefersOppositeSex	ShortTerm	C	163
121	192C	Male	24	174	67	Cuba	1	PrefersOppositeSex	LongTerm	E	173
121	192C	Male	24	174	67	Cuba	1	PrefersOppositeSex	ShortTerm	E	173
122	201C	Male	21	172	60	Cuba	1	PrefersOppositeSex	LongTerm	A	153
122	201C	Male	21	172	60	Cuba	1	PrefersOppositeSex	ShortTerm	A	153
123	206C	Male	23	172	70	Cuba	1	PrefersOppositeSex	LongTerm	D	168
123	206C	Male	23	172	70	Cuba	1	PrefersOppositeSex	ShortTerm	D	168
124	213C	Male	23	174	72	Cuba	1	PrefersOppositeSex	LongTerm	C	163
124	213C	Male	23	174	72	Cuba	1	PrefersOppositeSex	ShortTerm	C	163
125	216C	Male	23	178	70	Cuba	1	PrefersOppositeSex	LongTerm	B	158
125	216C	Male	23	178	70	Cuba	1	PrefersOppositeSex	ShortTerm	C	163
126	217C	Male	23	179	60	Cuba	1	PrefersOppositeSex	LongTerm	E	173
126	217C	Male	23	179	60	Cuba	1	PrefersOppositeSex	ShortTerm	C	163
127	220C	Male	22	180	75	Cuba	1	PrefersOppositeSex	LongTerm	C	163
127	220C	Male	22	180	75	Cuba	1	PrefersOppositeSex	ShortTerm	C	163
128	221C	Male	19	175	62	Cuba	1	PrefersOppositeSex	LongTerm	D	168
128	221C	Male	19	175	62	Cuba	1	PrefersOppositeSex	ShortTerm	C	163
129	222C	Male	22	189	85	Cuba	1	PrefersOppositeSex	LongTerm	D	168
129	222C	Male	22	189	85	Cuba	1	PrefersOppositeSex	ShortTerm	B	158
130	228C	Male	23	178	65	Cuba	1	PrefersOppositeSex	LongTerm	C	163
130	228C	Male	23	178	65	Cuba	1	PrefersOppositeSex	ShortTerm	C	163
131	229C	Male	23	175	62	Cuba	1	PrefersOppositeSex	LongTerm	C	163
131	229C	Male	23	175	62	Cuba	1	PrefersOppositeSex	ShortTerm	C	163
132	219C	Male	19	178	69	Cuba	1	PreferNotToSay	LongTerm	E	173
132	219C	Male	19	178	69	Cuba	1	PreferNotToSay	ShortTerm	D,E	182.5
301	38C	Female	22	150	56	Cuba	16	PrefersOppositeSex	LongTerm	E	185
301	38C	Female	22	150	56	Cuba	16	PrefersOppositeSex	ShortTerm
302	2C	Female	18	158	58	Cuba	1	PrefersOppositeSex	LongTerm	C	175
302	2C	Female	18	158	58	Cuba	1	PrefersOppositeSex	ShortTerm	C	175
303	3C	Female	18	165	45.5	Cuba	1	PrefersOppositeSex	LongTerm	C	175
303	3C	Female	18	165	45.5	Cuba	1	PrefersOppositeSex	ShortTerm	B	170
304	4C	Female	18	160	46	Cuba	1	PrefersOppositeSex	LongTerm	B	170
304	4C	Female	18	160	46	Cuba	1	PrefersOppositeSex	ShortTerm	B	170
305	5C	Female	18	166	57	Cuba	1	PrefersOppositeSex	LongTerm	C	175
305	5C	Female	18	166	57	Cuba	1	PrefersOppositeSex	ShortTerm	C	175
306	6C	Female	21	130	60	Cuba	1	PrefersOppositeSex	LongTerm	C	175
306	6C	Female	21	130	60	Cuba	1	PrefersOppositeSex	ShortTerm	C	175
307	7C	Female	22	169	45	Cuba	1	PrefersOppositeSex	LongTerm	D	180
307	7C	Female	22	169	45	Cuba	1	PrefersOppositeSex	ShortTerm	C	175
308	8C	Female	19	163	58	Cuba	1	PrefersOppositeSex	LongTerm	D	180
308	8C	Female	19	163	58	Cuba	1	PrefersOppositeSex	ShortTerm	E	185
309	9C	Female	18	150	54	Cuba	1	PrefersOppositeSex	LongTerm	C	175
309	9C	Female	18	150	54	Cuba	1	PrefersOppositeSex	ShortTerm	E	185
310	10C	Female	18	160	48	Cuba	1	PrefersOppositeSex	LongTerm	D	180
310	10C	Female	18	160	48	Cuba	1	PrefersOppositeSex	ShortTerm	D	180
311	11C	Female	19	171	68	Cuba	1	PrefersOppositeSex	LongTerm	E	185
311	11C	Female	19	171	68	Cuba	1	PrefersOppositeSex	ShortTerm	D	180
312	12C	Female	18	160	63	Cuba	1	PrefersOppositeSex	LongTerm	E	185
312	12C	Female	18	160	63	Cuba	1	PrefersOppositeSex	ShortTerm	D	180
313	13C	Female	19	161	57	Cuba	1	PrefersOppositeSex	LongTerm	E	185
313	13C	Female	19	161	57	Cuba	1	PrefersOppositeSex	ShortTerm	D	180
314	17C	Female	19	166	59	Cuba	1	PrefersOppositeSex	LongTerm	D	180
314	17C	Female	19	166	59	Cuba	1	PrefersOppositeSex	ShortTerm	C	175
315	22C	Female	18	165	55	Cuba	1	PrefersOppositeSex	LongTerm	E	185
315	22C	Female	18	165	55	Cuba	1	PrefersOppositeSex	ShortTerm	E	185
316	23C	Female	19	162	60	Cuba	1	PrefersOppositeSex	LongTerm	E	185
316	23C	Female	19	162	60	Cuba	1	PrefersOppositeSex	ShortTerm	E	185
317	25C	Female	21	180	56	Cuba	1	PrefersOppositeSex	LongTerm	E	185
317	25C	Female	21	180	56	Cuba	1	PrefersOppositeSex	ShortTerm	E	185
318	26C	Female	20	173	56.8	Cuba	1	PrefersOppositeSex	LongTerm	D	180
318	26C	Female	20	173	56.8	Cuba	1	PrefersOppositeSex	ShortTerm	C	175
319	30C	Female	21	158	43	Cuba	1	PrefersOppositeSex	LongTerm	C	175
319	30C	Female	21	158	43	Cuba	1	PrefersOppositeSex	ShortTerm	C	175
320	31C	Female	21	165	60	Cuba	1	PrefersOppositeSex	LongTerm	D	180
320	31C	Female	21	165	60	Cuba	1	PrefersOppositeSex	ShortTerm	D	180
321	32C	Female	21	161	50	Cuba	1	PrefersOppositeSex	LongTerm	C	175
321	32C	Female	21	161	50	Cuba	1	PrefersOppositeSex	ShortTerm	C	175
322	33C	Female	21	170	68	Cuba	1	PrefersOppositeSex	LongTerm	D	180
322	33C	Female	21	170	68	Cuba	1	PrefersOppositeSex	ShortTerm	D	180
323	34C	Female	20	152	45	Cuba	1	PrefersOppositeSex	LongTerm	A	165
323	34C	Female	20	152	45	Cuba	1	PrefersOppositeSex	ShortTerm	A	165
324	35C	Female	20	165	50	Cuba	1	PrefersOppositeSex	LongTerm	C	175
324	35C	Female	20	165	50	Cuba	1	PrefersOppositeSex	ShortTerm	C	175
325	36C	Female	24	161	60	Cuba	1	PrefersOppositeSex	LongTerm	D	180
325	36C	Female	24	161	60	Cuba	1	PrefersOppositeSex	ShortTerm	E	185
326	37C	Female	22	163	70	Cuba	1	PrefersOppositeSex	LongTerm	E	185
326	37C	Female	22	163	70	Cuba	1	PrefersOppositeSex	ShortTerm	E	185
327	39C	Female	19	165	56	Cuba	1	PrefersOppositeSex	LongTerm	D	180
327	39C	Female	19	165	56	Cuba	1	PrefersOppositeSex	ShortTerm	D,E	180
328	40C	Female	18	157	67	Cuba	1	PrefersOppositeSex	LongTerm	C	175
328	40C	Female	18	157	67	Cuba	1	PrefersOppositeSex	ShortTerm	C, D E	180
329	43C	Female	21	170	58	Cuba	1	PrefersOppositeSex	LongTerm	E	185
329	43C	Female	21	170	58	Cuba	1	PrefersOppositeSex	ShortTerm	D	180
330	44C	Female	21	165	52	Cuba	1	PrefersOppositeSex	LongTerm	D	180
330	44C	Female	21	165	52	Cuba	1	PrefersOppositeSex	ShortTerm	C	175
331	45C	Female	21	168	55	Cuba	1	PrefersOppositeSex	LongTerm	C	175
331	45C	Female	21	168	55	Cuba	1	PrefersOppositeSex	ShortTerm	C	175
332	46C	Female	21	179	60	Cuba	1	PrefersOppositeSex	LongTerm	E	185
332	46C	Female	21	179	60	Cuba	1	PrefersOppositeSex	ShortTerm	E	185
333	48C	Female	20	168	55	Cuba	1	PrefersOppositeSex	LongTerm	E	185
333	48C	Female	20	168	55	Cuba	1	PrefersOppositeSex	ShortTerm	E	185
334	49C	Female	22	170	70	Cuba	1	PrefersOppositeSex	LongTerm	E	185
334	49C	Female	22	170	70	Cuba	1	PrefersOppositeSex	ShortTerm	E	185
335	50C	Female	21	169	53	Cuba	1	PrefersOppositeSex	LongTerm	D	180
335	50C	Female	21	169	53	Cuba	1	PrefersOppositeSex	ShortTerm
336	54C	Female	20	163	60	Cuba	1	PrefersOppositeSex	LongTerm	E	185
336	54C	Female	20	163	60	Cuba	1	PrefersOppositeSex	ShortTerm	D	180
337	55C	Female	18	147	45	Cuba	1	PrefersOppositeSex	LongTerm	C	175
337	55C	Female	18	147	45	Cuba	1	PrefersOppositeSex	ShortTerm	C	175
338	56C	Female	20	170	50	Cuba	1	PrefersOppositeSex	LongTerm	E	185
338	56C	Female	20	170	50	Cuba	1	PrefersOppositeSex	ShortTerm	E	185
339	57C	Female	18	175	72	Cuba	1	PrefersOppositeSex	LongTerm	E	185
339	57C	Female	18	175	72	Cuba	1	PrefersOppositeSex	ShortTerm
340	61C	Female	19	168	68	Cuba	1	PrefersOppositeSex	LongTerm	E	185
340	61C	Female	19	168	68	Cuba	1	PrefersOppositeSex	ShortTerm	E	185
341	62C	Female	20	169	59	Cuba	1	PrefersOppositeSex	LongTerm	C	175
341	62C	Female	20	169	59	Cuba	1	PrefersOppositeSex	ShortTerm	D	180
342	64C	Female	20	160	70	Cuba	1	PrefersOppositeSex	LongTerm	D	180
342	64C	Female	20	160	70	Cuba	1	PrefersOppositeSex	ShortTerm	D	180
343	65C	Female	19	168	70	Cuba	1	PrefersOppositeSex	LongTerm	D	180
343	65C	Female	19	168	70	Cuba	1	PrefersOppositeSex	ShortTerm	D	180
344	66C	Female	19	167	67	Cuba	1	PrefersOppositeSex	LongTerm	E	185
344	66C	Female	19	167	67	Cuba	1	PrefersOppositeSex	ShortTerm	E	185
345	69C	Female	19	150	48	Cuba	1	PrefersOppositeSex	LongTerm	D	180
345	69C	Female	19	150	48	Cuba	1	PrefersOppositeSex	ShortTerm	D	180
346	70C	Female	19	165	46	Cuba	1	PrefersOppositeSex	LongTerm	C	175
346	70C	Female	19	165	46	Cuba	1	PrefersOppositeSex	ShortTerm	C	175
347	71C	Female	21	150	47	Cuba	1	PrefersOppositeSex	LongTerm	D	180
347	71C	Female	21	150	47	Cuba	1	PrefersOppositeSex	ShortTerm	D,E	182.5
348	72C	Female	19	164	52	Cuba	1	PrefersOppositeSex	LongTerm	C	175
348	72C	Female	19	164	52	Cuba	1	PrefersOppositeSex	ShortTerm	C	175
349	73C	Female	18	165	54	Cuba	1	PrefersOppositeSex	LongTerm	E	185
349	73C	Female	18	165	54	Cuba	1	PrefersOppositeSex	ShortTerm	E	185
350	75C	Female	18	157	50	Cuba	1	PrefersOppositeSex	LongTerm	C	175
350	75C	Female	18	157	50	Cuba	1	PrefersOppositeSex	ShortTerm	D	180
351	76C	Female	18	167	56	Cuba	1	PrefersOppositeSex	LongTerm	E	185
351	76C	Female	18	167	56	Cuba	1	PrefersOppositeSex	ShortTerm	F	185
352	77C	Female	18	163	47	Cuba	1	PrefersOppositeSex	LongTerm	D	180
352	77C	Female	18	163	47	Cuba	1	PrefersOppositeSex	ShortTerm	D	180
353	79C	Female	20	175	70	Cuba	1	PrefersOppositeSex	LongTerm	D	180
353	79C	Female	20	175	70	Cuba	1	PrefersOppositeSex	ShortTerm	D	180
354	91C	Female	18	153	40	Cuba	1	PrefersOppositeSex	LongTerm	E	185
354	91C	Female	18	153	40	Cuba	1	PrefersOppositeSex	ShortTerm	D	180
355	95C	Female	21	166	52	Cuba	1	PrefersOppositeSex	LongTerm	D	180
355	95C	Female	21	166	52	Cuba	1	PrefersOppositeSex	ShortTerm	D	180
356	97C	Female	21	155	54	Cuba	1	PrefersOppositeSex	LongTerm	D	180
356	97C	Female	21	155	54	Cuba	1	PrefersOppositeSex	ShortTerm	D	180
357	98C	Female	20	164	72	Cuba	1	PrefersOppositeSex	LongTerm	B	170
357	98C	Female	20	164	72	Cuba	1	PrefersOppositeSex	ShortTerm	B	170
358	100C	Female	20	165	48	Cuba	1	PrefersOppositeSex	LongTerm	D	180
358	100C	Female	20	165	48	Cuba	1	PrefersOppositeSex	ShortTerm	C	175
359	103C	Female	20	169	51	Cuba	1	PrefersOppositeSex	LongTerm	D	180
359	103C	Female	20	169	51	Cuba	1	PrefersOppositeSex	ShortTerm	D	180
360	104C	Female	18	167	62	Cuba	1	PrefersOppositeSex	LongTerm	D	180
360	104C	Female	18	167	62	Cuba	1	PrefersOppositeSex	ShortTerm	E	185
361	105C	Female	19	161	48	Cuba	1	PrefersOppositeSex	LongTerm	B	170
361	105C	Female	19	161	48	Cuba	1	PrefersOppositeSex	ShortTerm	D	180
362	107C	Female	19	168	54	Cuba	1	PrefersOppositeSex	LongTerm	C	175
362	107C	Female	19	168	54	Cuba	1	PrefersOppositeSex	ShortTerm	D	180
363	108C	Female	18	150	51	Cuba	1	PrefersOppositeSex	LongTerm	D	180
363	108C	Female	18	150	51	Cuba	1	PrefersOppositeSex	ShortTerm	D	180
364	110C	Female	18	170	62	Cuba	1	PrefersOppositeSex	LongTerm	D	180
364	110C	Female	18	170	62	Cuba	1	PrefersOppositeSex	ShortTerm	D	180
365	111C	Female	18	155	58	Cuba	1	PrefersOppositeSex	LongTerm	D	180
365	111C	Female	18	155	58	Cuba	1	PrefersOppositeSex	ShortTerm	D	180
366	121C	Female	21	173	66	Cuba	1	PrefersOppositeSex	LongTerm	D	180
366	121C	Female	21	173	66	Cuba	1	PrefersOppositeSex	ShortTerm	D	180
367	123C	Female	21	163	60	Cuba	1	PrefersOppositeSex	LongTerm	D	180
367	123C	Female	21	163	60	Cuba	1	PrefersOppositeSex	ShortTerm	D	180
368	124C	Female	23	155	42	Cuba	1	PrefersOppositeSex	LongTerm	C	175
368	124C	Female	23	155	42	Cuba	1	PrefersOppositeSex	ShortTerm	C	175
369	126C	Female	27	158	50	Cuba	1	PrefersOppositeSex	LongTerm	C,D	177.5
369	126C	Female	27	158	50	Cuba	1	PrefersOppositeSex	ShortTerm	C,D	177.5
370	129C	Female	26	162	50	Cuba	1	PrefersOppositeSex	LongTerm	E	185
370	129C	Female	26	162	50	Cuba	1	PrefersOppositeSex	ShortTerm	E	185
371	130C	Female	29	160	52	Cuba	1	PrefersOppositeSex	LongTerm	C	175
371	130C	Female	29	160	52	Cuba	1	PrefersOppositeSex	ShortTerm	C	175
372	131C	Female	24	167	61.5	Cuba	1	PrefersOppositeSex	LongTerm	D	180
372	131C	Female	24	167	61.5	Cuba	1	PrefersOppositeSex	ShortTerm	D	180
373	132C	Female	32	156	60	Cuba	1	PrefersOppositeSex	LongTerm	C	175
373	132C	Female	32	156	60	Cuba	1	PrefersOppositeSex	ShortTerm	C	175
374	134C	Female	26	165	60	Cuba	1	PrefersOppositeSex	LongTerm	D	180
374	134C	Female	26	165	60	Cuba	1	PrefersOppositeSex	ShortTerm	D	180
375	137C	Female	25	163	55.8	Cuba	1	PrefersOppositeSex	LongTerm	D	180
375	137C	Female	25	163	55.8	Cuba	1	PrefersOppositeSex	ShortTerm	D	180
376	142C	Female	30	157	61	Cuba	1	PrefersOppositeSex	LongTerm	C	175
376	142C	Female	30	157	61	Cuba	1	PrefersOppositeSex	ShortTerm	C	175
377	145C	Female	25	154	50	Cuba	1	PrefersOppositeSex	LongTerm	E	185
377	145C	Female	25	154	50	Cuba	1	PrefersOppositeSex	ShortTerm	D	180
378	150C	Female	27	159	51	Cuba	1	PrefersOppositeSex	LongTerm	C	175
378	150C	Female	27	159	51	Cuba	1	PrefersOppositeSex	ShortTerm	D	180
379	152C	Female	29	165	58	Cuba	1	PrefersOppositeSex	LongTerm	C	175
379	152C	Female	29	165	58	Cuba	1	PrefersOppositeSex	ShortTerm	C	175
380	153C	Female	30	160	58	Cuba	1	PrefersOppositeSex	LongTerm	D,C	177.5
380	153C	Female	30	160	58	Cuba	1	PrefersOppositeSex	ShortTerm	B,C,D,E	177.5
381	159C	Female	23	180	70	Cuba	1	PrefersOppositeSex	LongTerm	E	185
381	159C	Female	23	180	70	Cuba	1	PrefersOppositeSex	ShortTerm	E	185
382	162C	Female	31	160	70	Cuba	1	PrefersOppositeSex	LongTerm	B	170
382	162C	Female	31	160	70	Cuba	1	PrefersOppositeSex	ShortTerm	E	185
383	163C	Female	26	152	51	Cuba	1	PrefersOppositeSex	LongTerm	D	180
383	163C	Female	26	152	51	Cuba	1	PrefersOppositeSex	ShortTerm	D	180
384	164C	Female	22	157	65	Cuba	1	PrefersOppositeSex	LongTerm	D	180
384	164C	Female	22	157	65	Cuba	1	PrefersOppositeSex	ShortTerm	D	180
385	165C	Female	27	162	51	Cuba	1	PrefersOppositeSex	LongTerm	D	180
385	165C	Female	27	162	51	Cuba	1	PrefersOppositeSex	ShortTerm	C	175
386	169C	Female	29	165	63	Cuba	1	PrefersOppositeSex	LongTerm	C	175
386	169C	Female	29	165	63	Cuba	1	PrefersOppositeSex	ShortTerm	C	175
387	172C	Female	22	171	84	Cuba	1	PrefersOppositeSex	LongTerm	D	180
387	172C	Female	22	171	84	Cuba	1	PrefersOppositeSex	ShortTerm	D	180
388	174C	Female	23	161	50	Cuba	1	PrefersOppositeSex	LongTerm	C	175
388	174C	Female	23	161	50	Cuba	1	PrefersOppositeSex	ShortTerm	C	175
389	175C	Female	21	170	55	Cuba	1	PrefersOppositeSex	LongTerm	D	180
389	175C	Female	21	170	55	Cuba	1	PrefersOppositeSex	ShortTerm	D	180
390	181C	Female	22	167	61	Cuba	1	PrefersOppositeSex	LongTerm	B	170
390	181C	Female	22	167	61	Cuba	1	PrefersOppositeSex	ShortTerm	C	175
391	182C	Female	26	158	48	Cuba	1	PrefersOppositeSex	LongTerm	C	175
391	182C	Female	26	158	48	Cuba	1	PrefersOppositeSex	ShortTerm	C	175
392	209C	Female	19	164	44	Cuba	1	PrefersOppositeSex	LongTerm	B	170
392	209C	Female	19	164	44	Cuba	1	PrefersOppositeSex	ShortTerm	B	170
393	212C	Female	19	164	47	Cuba	1	PrefersOppositeSex	LongTerm	E	185
393	212C	Female	19	164	47	Cuba	1	PrefersOppositeSex	ShortTerm	C	175
394	215C	Female	22	160		Cuba	1	PrefersOppositeSex	LongTerm	D	180
394	215C	Female	22	160		Cuba	1	PrefersOppositeSex	ShortTerm
395	218C	Female	22	153	52	Cuba	1	PrefersOppositeSex	LongTerm	C	175
395	218C	Female	22	153	52	Cuba	1	PrefersOppositeSex	ShortTerm	D	180
396	223C	Female	21	162	50	Cuba	1	PrefersOppositeSex	LongTerm	D	180
396	223C	Female	21	162	50	Cuba	1	PrefersOppositeSex	ShortTerm	B	170
397	224C	Female	19	168	49	Cuba	1	PrefersOppositeSex	LongTerm	E	185
397	224C	Female	19	168	49	Cuba	1	PrefersOppositeSex	ShortTerm	D	180
398	225C	Female	20	175	55	Cuba	1	PrefersOppositeSex	LongTerm	D	180
398	225C	Female	20	175	55	Cuba	1	PrefersOppositeSex	ShortTerm	C	175
399	227C	Female	20	170	61	Cuba	1	PrefersOppositeSex	LongTerm	D	180
399	227C	Female	20	170	61	Cuba	1	PrefersOppositeSex	ShortTerm	C	175
400	230C	Female	20	152		Cuba	1	PrefersOppositeSex	LongTerm	D	180
400	230C	Female	20	152		Cuba	1	PrefersOppositeSex	ShortTerm	E	185
401	27C	Female	18	176	62	Cuba	1	PrefersEitherSex	LongTerm	E	185
401	27C	Female	18	176	62	Cuba	1	PrefersEitherSex	ShortTerm	E	185
133	14N	Male	27	190.5	95	Norway	19	PrefersOppositeSex	LongTerm	C	163
133	14N	Male	27	190.5	95	Norway	19	PrefersOppositeSex	ShortTerm	C	163
134	5N	Male	36	173	90	Norway	21	PrefersOppositeSex	LongTerm	B	158
134	5N	Male	36	173	90	Norway	21	PrefersOppositeSex	ShortTerm	A-E	163
135	32N	Male	40	180	86	Norway	22	PrefersOppositeSex	LongTerm	C	163
135	32N	Male	40	180	86	Norway	22	PrefersOppositeSex	ShortTerm
136	45N	Male	45	190	118	Norway	12	PrefersOppositeSex	LongTerm	C	163
136	45N	Male	45	190	118	Norway	12	PrefersOppositeSex	ShortTerm	C	163
137	66N	Male	16	183	62	Norway	26	PrefersOppositeSex	LongTerm	C	163
137	66N	Male	16	183	62	Norway	26	PrefersOppositeSex	ShortTerm	B, C	160.5
138	92N	Male	27	165	54	Norway	28	PrefersOppositeSex	LongTerm	C	163
138	92N	Male	27	165	54	Norway	28	PrefersOppositeSex	ShortTerm	E	173
139	1N	Male	29	179	83	Norway	3	PrefersOppositeSex	LongTerm	D	168
139	1N	Male	29	179	83	Norway	3	PrefersOppositeSex	ShortTerm	D	168
140	4N	Male	25	186	103	Norway	3	PrefersOppositeSex	LongTerm	D	168
140	4N	Male	25	186	103	Norway	3	PrefersOppositeSex	ShortTerm	D	168
141	8N	Male	29	188	107	Norway	3	PrefersOppositeSex	LongTerm	C	163
141	8N	Male	29	188	107	Norway	3	PrefersOppositeSex	ShortTerm	B	158
142	9N	Male	15	175	70	Norway	3	PrefersOppositeSex	LongTerm	D	168
142	9N	Male	15	175	70	Norway	3	PrefersOppositeSex	ShortTerm	D	168
143	18N	Male	24	179	69	Norway	3	PrefersOppositeSex	LongTerm	D	168
143	18N	Male	24	179	69	Norway	3	PrefersOppositeSex	ShortTerm	D	168
144	21N	Male	18	175	66	Norway	3	PrefersOppositeSex	LongTerm	D	168
144	21N	Male	18	175	66	Norway	3	PrefersOppositeSex	ShortTerm	D	168
145	22N	Male	17	185	61	Norway	3	PrefersOppositeSex	LongTerm	E	173
145	22N	Male	17	185	61	Norway	3	PrefersOppositeSex	ShortTerm	E	173
146	23N	Male	16	180	67.5	Norway	3	PrefersOppositeSex	LongTerm	D	168
146	23N	Male	16	180	67.5	Norway	3	PrefersOppositeSex	ShortTerm	D	168
147	27N	Male	27	175	71	Norway	3	PrefersOppositeSex	LongTerm	B	158
147	27N	Male	27	175	71	Norway	3	PrefersOppositeSex	ShortTerm	B	158
148	46N	Male	50	194	90	Norway	3	PrefersOppositeSex	LongTerm	E	173
148	46N	Male	50	194	90	Norway	3	PrefersOppositeSex	ShortTerm	E	173
149	50N	Male	20	188	75	Norway	3	PrefersOppositeSex	LongTerm	D	168
149	50N	Male	20	188	75	Norway	3	PrefersOppositeSex	ShortTerm	C	163
150	51N	Male	34	183	84	Norway	3	PrefersOppositeSex	LongTerm	D	168
150	51N	Male	34	183	84	Norway	3	PrefersOppositeSex	ShortTerm	D	168
151	52N	Male	48	183	88	Norway	3	PrefersOppositeSex	LongTerm	D	168
151	52N	Male	48	183	88	Norway	3	PrefersOppositeSex	ShortTerm	D	168
152	53N	Male	61	182	80	Norway	3	PrefersOppositeSex	LongTerm	D	168
152	53N	Male	61	182	80	Norway	3	PrefersOppositeSex	ShortTerm	D	168
153	55N	Male	75	175	65	Norway	3	PrefersOppositeSex	LongTerm	C, D	165.5
153	55N	Male	75	175	65	Norway	3	PrefersOppositeSex	ShortTerm
154	58N	Male	18	181	59	Norway	3	PrefersOppositeSex	LongTerm	D	168
154	58N	Male	18	181	59	Norway	3	PrefersOppositeSex	ShortTerm	E	173
155	62N	Male	17	185	125	Norway	3	PrefersOppositeSex	LongTerm	D	168
155	62N	Male	17	185	125	Norway	3	PrefersOppositeSex	ShortTerm	B	158
156	68N	Male	28	180	77.4	Norway	3	PrefersOppositeSex	LongTerm	E	173
156	68N	Male	28	180	77.4	Norway	3	PrefersOppositeSex	ShortTerm	E	173
157	82N	Male	48	200	115	Norway	3	PrefersOppositeSex	LongTerm	E	173
157	82N	Male	48	200	115	Norway	3	PrefersOppositeSex	ShortTerm	E	173
158	84N	Male	61	180	75	Norway	3	PrefersOppositeSex	LongTerm	E	173
158	84N	Male	61	180	75	Norway	3	PrefersOppositeSex	ShortTerm	E	173
159	86N	Male	26	172	97	Norway	3	PrefersOppositeSex	LongTerm	B	158
159	86N	Male	26	172	97	Norway	3	PrefersOppositeSex	ShortTerm	A	153
160	89N	Male	45	185	115	Norway	3	PrefersOppositeSex	LongTerm	E	173
160	89N	Male	45	185	115	Norway	3	PrefersOppositeSex	ShortTerm	E	173
161	93N	Male	24	186	82	Norway	3	PrefersOppositeSex	LongTerm	C	163
161	93N	Male	24	186	82	Norway	3	PrefersOppositeSex	ShortTerm
162	95N	Male	32	179	95	Norway	3	PrefersOppositeSex	LongTerm	A	153
162	95N	Male	32	179	95	Norway	3	PrefersOppositeSex	ShortTerm	B	158
163	96N	Male	33	175	100	Norway	3	PrefersOppositeSex	LongTerm	C	163
163	96N	Male	33	175	100	Norway	3	PrefersOppositeSex	ShortTerm	C	163
164	101N	Male	35	174	97	Norway	3	PrefersOppositeSex	LongTerm	B, C	160.5
164	101N	Male	35	174	97	Norway	3	PrefersOppositeSex	ShortTerm	A,B,C,D,E	163
165	105N	Male	56	176	92	Norway	3	PrefersOppositeSex	LongTerm	D	168
165	105N	Male	56	176	92	Norway	3	PrefersOppositeSex	ShortTerm	D	168
166	106N	Male	56	184	80	Norway	3	PrefersOppositeSex	LongTerm	C	163
166	106N	Male	56	184	80	Norway	3	PrefersOppositeSex	ShortTerm	C	163
167	109N	Male	53	176	87	Norway	3	PrefersOppositeSex	LongTerm	C	163
167	109N	Male	53	176	87	Norway	3	PrefersOppositeSex	ShortTerm	C	163
168	115N	Male	45	195	110	Norway	3	PrefersOppositeSex	LongTerm	C	163
168	115N	Male	45	195	110	Norway	3	PrefersOppositeSex	ShortTerm	C	163
169	123N	Male	33	193	90	Norway	3	PrefersOppositeSex	LongTerm	E	173
169	123N	Male	33	193	90	Norway	3	PrefersOppositeSex	ShortTerm	D	168
170	94N	Male	32	173	70	Norway	3	PrefersSameSex	LongTerm	C, D	165.5
170	94N	Male	32	173	70	Norway	3	PrefersSameSex	ShortTerm	D, E	170.5
171	97N	Male	34	178	99	Norway	3	PrefersEitherSex	LongTerm	D	168
171	97N	Male	34	178	99	Norway	3	PrefersEitherSex	ShortTerm	D	168
172	110N	Male	27	175	72	Norway	3	PrefersEitherSex	LongTerm	C	163
172	110N	Male	27	175	72	Norway	3	PrefersEitherSex	ShortTerm	B, D	163
173	35N	Male	18	181	112	Norway	33	PrefersOppositeSex	LongTerm	E	173
173	35N	Male	18	181	112	Norway	33	PrefersOppositeSex	ShortTerm	C,D,E	168
174	67N	Male	19	175	63	Norway	36	PrefersOppositeSex	LongTerm	B, C	160.5
174	67N	Male	19	175	63	Norway	36	PrefersOppositeSex	ShortTerm	A,B,C,D,E	163
402	75N	Female	26	160	51	Norway	18	PrefersOppositeSex	LongTerm	E	185
402	75N	Female	26	160	51	Norway	18	PrefersOppositeSex	ShortTerm	E	185
403	70N	Female	18	174	53	Norway	20	PrefersOppositeSex	LongTerm	E	185
403	70N	Female	18	174	53	Norway	20	PrefersOppositeSex	ShortTerm	E	185
404	71N	Female	17	165.5	46	Norway	25	PrefersOppositeSex	LongTerm	D	180
404	71N	Female	17	165.5	46	Norway	25	PrefersOppositeSex	ShortTerm	D	180
405	31N	Female	31	173	60	Norway	39	PrefersSameSex	LongTerm	E	185
405	31N	Female	31	173	60	Norway	39	PrefersSameSex	ShortTerm
406	30N	Female	30	165	57	Norway	30	PrefersOppositeSex	LongTerm	E	185
406	30N	Female	30	165	57	Norway	30	PrefersOppositeSex	ShortTerm	E	185
407	2N	Female	21	173	80	Norway	3	PrefersOppositeSex	LongTerm	D	180
407	2N	Female	21	173	80	Norway	3	PrefersOppositeSex	ShortTerm	D	180
408	3N	Female	25	170	66	Norway	3	PrefersOppositeSex	LongTerm	C	175
408	3N	Female	25	170	66	Norway	3	PrefersOppositeSex	ShortTerm	C	175
409	6N	Female	22	172	85	Norway	3	PrefersOppositeSex	LongTerm	E	185
409	6N	Female	22	172	85	Norway	3	PrefersOppositeSex	ShortTerm	E	185
410	7N	Female	67	171	100	Norway	3	PrefersOppositeSex	LongTerm	E	185
410	7N	Female	67	171	100	Norway	3	PrefersOppositeSex	ShortTerm
411	10N	Female	23	168	75	Norway	3	PrefersOppositeSex	LongTerm	D	180
411	10N	Female	23	168	75	Norway	3	PrefersOppositeSex	ShortTerm	A,B,C,D,E	175
412	11N	Female	26	164	62	Norway	3	PrefersOppositeSex	LongTerm	E	185
412	11N	Female	26	164	62	Norway	3	PrefersOppositeSex	ShortTerm	E	185
413	12N	Female	26	168	54	Norway	3	PrefersOppositeSex	LongTerm	D	180
413	12N	Female	26	168	54	Norway	3	PrefersOppositeSex	ShortTerm	E	185
414	13N	Female	31	167	54	Norway	3	PrefersOppositeSex	LongTerm	B, C	172.5
414	13N	Female	31	167	54	Norway	3	PrefersOppositeSex	ShortTerm	B,C	172.5
415	15N	Female	39	169	66	Norway	3	PrefersOppositeSex	LongTerm	D	180
415	15N	Female	39	169	66	Norway	3	PrefersOppositeSex	ShortTerm	E	185
416	24N	Female	16	155.5	52	Norway	3	PrefersOppositeSex	LongTerm	C	175
416	24N	Female	16	155.5	52	Norway	3	PrefersOppositeSex	ShortTerm	B	170
417	26N	Female	16	173	52	Norway	3	PrefersOppositeSex	LongTerm	E	185
417	26N	Female	16	173	52	Norway	3	PrefersOppositeSex	ShortTerm	D	180
418	28N	Female	25	163	52	Norway	3	PrefersOppositeSex	LongTerm	E	185
418	28N	Female	25	163	52	Norway	3	PrefersOppositeSex	ShortTerm	E	185
419	29N	Female	22	174	68	Norway	3	PrefersOppositeSex	LongTerm	E	185
419	29N	Female	22	174	68	Norway	3	PrefersOppositeSex	ShortTerm	E	185
420	43N	Female	27	159	55	Norway	3	PrefersOppositeSex	LongTerm	B	170
420	43N	Female	27	159	55	Norway	3	PrefersOppositeSex	ShortTerm
421	44N	Female	25	157	68	Norway	3	PrefersOppositeSex	LongTerm	B	170
421	44N	Female	25	157	68	Norway	3	PrefersOppositeSex	ShortTerm
422	54N	Female	66	166	60	Norway	3	PrefersOppositeSex	LongTerm	D	180
422	54N	Female	66	166	60	Norway	3	PrefersOppositeSex	ShortTerm	D	180
423	56N	Female	39	160	50	Norway	3	PrefersOppositeSex	LongTerm	D	180
423	56N	Female	39	160	50	Norway	3	PrefersOppositeSex	ShortTerm	D	180
424	72N	Female	33	158		Norway	3	PrefersOppositeSex	LongTerm	D	180
424	72N	Female	33	158		Norway	3	PrefersOppositeSex	ShortTerm
425	79N	Female	16	172	50.9	Norway	3	PrefersOppositeSex	LongTerm	E	185
425	79N	Female	16	172	50.9	Norway	3	PrefersOppositeSex	ShortTerm	E	185
426	83N	Female	42	173	80	Norway	3	PrefersOppositeSex	LongTerm	D	180
426	83N	Female	42	173	80	Norway	3	PrefersOppositeSex	ShortTerm	D	180
427	85N	Female	61	154	70	Norway	3	PrefersOppositeSex	LongTerm	A	165
427	85N	Female	61	154	70	Norway	3	PrefersOppositeSex	ShortTerm	A	165
428	102N	Female	27	167	65	Norway	3	PrefersOppositeSex	LongTerm	E	185
428	102N	Female	27	167	65	Norway	3	PrefersOppositeSex	ShortTerm	E	185
429	103N	Female	21	166	53	Norway	3	PrefersOppositeSex	LongTerm	D	180
429	103N	Female	21	166	53	Norway	3	PrefersOppositeSex	ShortTerm	D	180
430	104N	Female	34	175	67	Norway	3	PrefersOppositeSex	LongTerm	E	185
430	104N	Female	34	175	67	Norway	3	PrefersOppositeSex	ShortTerm	E	185
431	107N	Female	51	171	75	Norway	3	PrefersOppositeSex	LongTerm	D	180
431	107N	Female	51	171	75	Norway	3	PrefersOppositeSex	ShortTerm	E	185
432	108N	Female	43	164	75	Norway	3	PrefersOppositeSex	LongTerm	C	175
432	108N	Female	43	164	75	Norway	3	PrefersOppositeSex	ShortTerm	C	175
433	112N	Female	15	168	68	Norway	3	PrefersOppositeSex	LongTerm	D	180
433	112N	Female	15	168	68	Norway	3	PrefersOppositeSex	ShortTerm	D	180
434	113N	Female	43	177	85	Norway	3	PrefersOppositeSex	LongTerm	E	185
434	113N	Female	43	177	85	Norway	3	PrefersOppositeSex	ShortTerm	E	185
435	116N	Female	15	169	70	Norway	3	PrefersOppositeSex	LongTerm	D	180
435	116N	Female	15	169	70	Norway	3	PrefersOppositeSex	ShortTerm	D	180
436	121N	Female	50	170	68	Norway	3	PrefersOppositeSex	LongTerm	D	180
436	121N	Female	50	170	68	Norway	3	PrefersOppositeSex	ShortTerm	D	180
437	124N	Female	30	170	65	Norway	3	PrefersOppositeSex	LongTerm	E	185
437	124N	Female	30	170	65	Norway	3	PrefersOppositeSex	ShortTerm	E	185
438	126N	Female	21	172	48	Norway	3	PrefersOppositeSex	LongTerm	D	180
438	126N	Female	21	172	48	Norway	3	PrefersOppositeSex	ShortTerm
439	127N	Female	18	174	53	Norway	3	PrefersOppositeSex	LongTerm	E	185
439	127N	Female	18	174	53	Norway	3	PrefersOppositeSex	ShortTerm	D	180
440	128N	Female	52	167	60	Norway	3	PrefersOppositeSex	LongTerm	D	180
440	128N	Female	52	167	60	Norway	3	PrefersOppositeSex	ShortTerm	D	180
441	132N	Female	27	168	50	Norway	3	PrefersOppositeSex	LongTerm	C	175
441	132N	Female	27	168	50	Norway	3	PrefersOppositeSex	ShortTerm	E	185
442	133N	Female	27	167	72	Norway	3	PrefersOppositeSex	LongTerm	D	180
442	133N	Female	27	167	72	Norway	3	PrefersOppositeSex	ShortTerm	C	175
443	134N	Female	19	167	55	Norway	3	PrefersOppositeSex	LongTerm	D	180
443	134N	Female	19	167	55	Norway	3	PrefersOppositeSex	ShortTerm	C	175
444	88N	Female	19	164	55	Norway	3	PrefersSameSex	LongTerm	C, D	165.5
444	88N	Female	19	164	55	Norway	3	PrefersSameSex	ShortTerm	C, D	165.5
445	120N	Female	52	165	68	Norway	3	PrefersSameSex	LongTerm	C	163
445	120N	Female	52	165	68	Norway	3	PrefersSameSex	ShortTerm	E	173
446	87N	Female	28	172	60	Norway	3	PrefersEitherSex	LongTerm
446	87N	Female	28	172	60	Norway	3	PrefersEitherSex	ShortTerm	E	185
447	25N	Female	16	158	60	Norway	3	PrefersEitherSex	LongTerm	D/C	177.5
447	25N	Female	16	158	60	Norway	3	PrefersEitherSex	ShortTerm	D	180
448	60N	Female	17	174	100	Norway	32	PrefersOppositeSex	LongTerm	D	180
448	60N	Female	17	174	100	Norway	32	PrefersOppositeSex	ShortTerm	C	175
449	16N	Female	27	177	67	Norway	10	PrefersOppositeSex	LongTerm	E	185
449	16N	Female	27	177	67	Norway	10	PrefersOppositeSex	ShortTerm	E	185
450	33N	Female	16	170	63	Norway	10	PrefersOppositeSex	LongTerm	E	185
450	33N	Female	16	170	63	Norway	10	PrefersOppositeSex	ShortTerm	B,C,D,E	177.5
451	59N	Female	18	161	64	Norway	10	PrefersEitherSex	LongTerm	D	180
451	59N	Female	18	161	64	Norway	10	PrefersEitherSex	ShortTerm	A,B,C,D,E	175
452	34N	Female	16	175	72	Norway	14	PrefersOppositeSex	LongTerm	E	185
452	34N	Female	16	175	72	Norway	14	PrefersOppositeSex	ShortTerm	C,D,E	180
453	76N	Female	20	160	55	Norway	15	PrefersOppositeSex	LongTerm	D	180
453	76N	Female	20	160	55	Norway	15	PrefersOppositeSex	ShortTerm	E	185
454	77N	Female	20	170	59	Norway	15	PrefersOppositeSex	LongTerm	D	180
454	77N	Female	20	170	59	Norway	15	PrefersOppositeSex	ShortTerm	E	185
175	4U	Male	68	170.18	79.38	USA	2	PrefersOppositeSex	LongTerm	C	163
175	4U	Male	68	170.18	79.38	USA	2	PrefersOppositeSex	ShortTerm	C	163
176	13U	Male	27	180.34	77.11	USA	2	PrefersOppositeSex	LongTerm	D	168
176	13U	Male	27	180.34	77.11	USA	2	PrefersOppositeSex	ShortTerm	D	168
177	15U	Male	59	172.72	88.45	USA	2	PrefersOppositeSex	LongTerm	D	168
177	15U	Male	59	172.72	88.45	USA	2	PrefersOppositeSex	ShortTerm	E	173
178	24U	Male	25	185.42	74.84	USA	2	PrefersOppositeSex	LongTerm	A	153
178	24U	Male	25	185.42	74.84	USA	2	PrefersOppositeSex	ShortTerm	B	158
179	25U	Male	26	187.96	136.08	USA	2	PrefersOppositeSex	LongTerm	D	168
179	25U	Male	26	187.96	136.08	USA	2	PrefersOppositeSex	ShortTerm	B	158
180	27U	Male	25	182.88	77.11	USA	2	PrefersOppositeSex	LongTerm	D	168
180	27U	Male	25	182.88	77.11	USA	2	PrefersOppositeSex	ShortTerm	B	158
181	28U	Male	19	175.26	77.11	USA	2	PrefersOppositeSex	LongTerm	B	158
181	28U	Male	19	175.26	77.11	USA	2	PrefersOppositeSex	ShortTerm	E	173
182	30U	Male	27	172.72	72.57	USA	2	PrefersOppositeSex	LongTerm	B	158
182	30U	Male	27	172.72	72.57	USA	2	PrefersOppositeSex	ShortTerm	B	158
183	31U	Male	56	172.72	76.2	USA	2	PrefersOppositeSex	LongTerm	C	163
183	31U	Male	56	172.72	76.2	USA	2	PrefersOppositeSex	ShortTerm	E	173
184	32U	Male	27	185.42	83.91	USA	2	PrefersOppositeSex	LongTerm	C	163
184	32U	Male	27	185.42	83.91	USA	2	PrefersOppositeSex	ShortTerm	D	168
185	39U	Male	22	200.66	149.69	USA	2	PrefersOppositeSex	LongTerm	C	163
185	39U	Male	22	200.66	149.69	USA	2	PrefersOppositeSex	ShortTerm	C	163
186	47U	Male	29	180.34	77.11	USA	2	PrefersOppositeSex	LongTerm	D	168
186	47U	Male	29	180.34	77.11	USA	2	PrefersOppositeSex	ShortTerm	D	168
187	48U	Male	24	165.1	70.31	USA	2	PrefersOppositeSex	LongTerm	B	158
187	48U	Male	24	165.1	70.31	USA	2	PrefersOppositeSex	ShortTerm	A	153
188	53U	Male	29	193.04	91.17	USA	2	PrefersOppositeSex	LongTerm	E	173
188	53U	Male	29	193.04	91.17	USA	2	PrefersOppositeSex	ShortTerm	C	163
189	55U	Male	42	182.88	113.4	USA	2	PrefersOppositeSex	LongTerm	E	173
189	55U	Male	42	182.88	113.4	USA	2	PrefersOppositeSex	ShortTerm	E	173
190	62U	Male	22	152.4	108.86	USA	2	PrefersOppositeSex	LongTerm	D	168
190	62U	Male	22	152.4	108.86	USA	2	PrefersOppositeSex	ShortTerm	C	163
191	63U	Male	64	172.72	74.84	USA	2	PrefersOppositeSex	LongTerm	C	163
191	63U	Male	64	172.72	74.84	USA	2	PrefersOppositeSex	ShortTerm	C	163
192	70U	Male	29	180.34	77.11	USA	2	PrefersOppositeSex	LongTerm	D	168
192	70U	Male	29	180.34	77.11	USA	2	PrefersOppositeSex	ShortTerm	D	168
193	75U	Male	34	185.42	115.21	USA	2	PrefersOppositeSex	LongTerm	C	163
193	75U	Male	34	185.42	115.21	USA	2	PrefersOppositeSex	ShortTerm	C	163
194	79U	Male	64	172.72	77.11	USA	2	PrefersOppositeSex	LongTerm	C	163
194	79U	Male	64	172.72	77.11	USA	2	PrefersOppositeSex	ShortTerm	C	163
195	82U	Male	56	180.34	86.18	USA	2	PrefersOppositeSex	LongTerm	D	168
195	82U	Male	56	180.34	86.18	USA	2	PrefersOppositeSex	ShortTerm	A	153
196	83U	Male	22	177.8	108.86	USA	2	PrefersOppositeSex	LongTerm	D	168
196	83U	Male	22	177.8	108.86	USA	2	PrefersOppositeSex	ShortTerm	C	163
197	85U	Male	29	187.96	70.31	USA	2	PrefersOppositeSex	LongTerm	A	153
197	85U	Male	29	187.96	70.31	USA	2	PrefersOppositeSex	ShortTerm	A	153
198	88U	Male	25	193.04	94.35	USA	2	PrefersOppositeSex	LongTerm	D	168
198	88U	Male	25	193.04	94.35	USA	2	PrefersOppositeSex	ShortTerm	D	168
199	102U	Male	36	165.1	90.72	USA	2	PrefersOppositeSex	LongTerm	C	163
199	102U	Male	36	165.1	90.72	USA	2	PrefersOppositeSex	ShortTerm	D	168
200	103U	Male	70	182.88	79.83	USA	2	PrefersOppositeSex	LongTerm	B	158
200	103U	Male	70	182.88	79.83	USA	2	PrefersOppositeSex	ShortTerm	B	158
201	110U	Male	25	185.42	61.23	USA	2	PrefersOppositeSex	LongTerm	E	173
201	110U	Male	25	185.42	61.23	USA	2	PrefersOppositeSex	ShortTerm	D	168
202	44U	Male	24	193.04	113.4	USA	2	PrefersSameSex	LongTerm	D	180
202	44U	Male	24	193.04	113.4	USA	2	PrefersSameSex	ShortTerm	A	165
203	73U	Male	21	177.8	108.86	USA	2	PrefersSameSex	LongTerm	D	180
203	73U	Male	21	177.8	108.86	USA	2	PrefersSameSex	ShortTerm	E	185
455	2U	Female	35	175.26	65.77	USA	2	PrefersOppositeSex	LongTerm	D	180
455	2U	Female	35	175.26	65.77	USA	2	PrefersOppositeSex	ShortTerm	D	180
456	3U	Female	49	165.1	77.11	USA	2	PrefersOppositeSex	LongTerm	E	185
456	3U	Female	49	165.1	77.11	USA	2	PrefersOppositeSex	ShortTerm	A	165
457	5U	Female	50	170.18	58.97	USA	2	PrefersOppositeSex	LongTerm	D	180
457	5U	Female	50	170.18	58.97	USA	2	PrefersOppositeSex	ShortTerm	D	180
458	6U	Female	56	157.48	72.57	USA	2	PrefersOppositeSex	LongTerm	E	185
458	6U	Female	56	157.48	72.57	USA	2	PrefersOppositeSex	ShortTerm	E	185
459	7U	Female	51	170.18	70.31	USA	2	PrefersOppositeSex	LongTerm	E	185
459	7U	Female	51	170.18	70.31	USA	2	PrefersOppositeSex	ShortTerm	E	185
460	8U	Female	43	172.72	63.5	USA	2	PrefersOppositeSex	LongTerm	E	185
460	8U	Female	43	172.72	63.5	USA	2	PrefersOppositeSex	ShortTerm	E	185
461	9U	Female	30	170.18	68.04	USA	2	PrefersOppositeSex	LongTerm	D	180
461	9U	Female	30	170.18	68.04	USA	2	PrefersOppositeSex	ShortTerm	D	180
462	10U	Female	20	176.53	99.79	USA	2	PrefersOppositeSex	LongTerm	D	180
462	10U	Female	20	176.53	99.79	USA	2	PrefersOppositeSex	ShortTerm	E	185
463	11U	Female	54	152.4	72.57	USA	2	PrefersOppositeSex	LongTerm	D	180
463	11U	Female	54	152.4	72.57	USA	2	PrefersOppositeSex	ShortTerm	D	180
464	12U	Female	48	162.56	102.06	USA	2	PrefersOppositeSex	LongTerm	C	175
464	12U	Female	48	162.56	102.06	USA	2	PrefersOppositeSex	ShortTerm	C	175
465	14U	Female	27	170.18	65.77	USA	2	PrefersOppositeSex	LongTerm	E	185
465	14U	Female	27	170.18	65.77	USA	2	PrefersOppositeSex	ShortTerm	E	185
466	16U	Female	23	165.1	56.7	USA	2	PrefersOppositeSex	LongTerm	C	175
466	16U	Female	23	165.1	56.7	USA	2	PrefersOppositeSex	ShortTerm	C	175
467	17U	Female	24	167.64	81.19	USA	2	PrefersOppositeSex	LongTerm	E	185
467	17U	Female	24	167.64	81.19	USA	2	PrefersOppositeSex	ShortTerm	D	180
468	18U	Female	54	175.26	61.23	USA	2	PrefersOppositeSex	LongTerm	C	175
468	18U	Female	54	175.26	61.23	USA	2	PrefersOppositeSex	ShortTerm	A	165
469	20U	Female	24	170.18	111.13	USA	2	PrefersOppositeSex	LongTerm	D	180
469	20U	Female	24	170.18	111.13	USA	2	PrefersOppositeSex	ShortTerm
470	21U	Female	28	154.94	48.99	USA	2	PrefersOppositeSex	LongTerm	E	185
470	21U	Female	28	154.94	48.99	USA	2	PrefersOppositeSex	ShortTerm	E	185
471	22U	Female	27	167.64	63.5	USA	2	PrefersOppositeSex	LongTerm	E	185
471	22U	Female	27	167.64	63.5	USA	2	PrefersOppositeSex	ShortTerm	E	185
472	29U	Female	51	167.64	74.84	USA	2	PrefersOppositeSex	LongTerm	D	180
472	29U	Female	51	167.64	74.84	USA	2	PrefersOppositeSex	ShortTerm	D	180
473	33U	Female	20	144.78	55.79	USA	2	PrefersOppositeSex	LongTerm	C	175
473	33U	Female	20	144.78	55.79	USA	2	PrefersOppositeSex	ShortTerm	E	185
474	34U	Female	23	172.72	99.79	USA	2	PrefersOppositeSex	LongTerm	E	185
474	34U	Female	23	172.72	99.79	USA	2	PrefersOppositeSex	ShortTerm	D	180
475	35U	Female	28	167.64	99.79	USA	2	PrefersOppositeSex	LongTerm	E	185
475	35U	Female	28	167.64	99.79	USA	2	PrefersOppositeSex	ShortTerm	D	180
476	37U	Female	29	160.02	70.31	USA	2	PrefersOppositeSex	LongTerm	D	180
476	37U	Female	29	160.02	70.31	USA	2	PrefersOppositeSex	ShortTerm	E	185
477	38U	Female	61	165.1	28.58	USA	2	PrefersOppositeSex	LongTerm	D	180
477	38U	Female	61	165.1	28.58	USA	2	PrefersOppositeSex	ShortTerm	E	185
478	40U	Female	51	165.1	127.01	USA	2	PrefersOppositeSex	LongTerm	D	180
478	40U	Female	51	165.1	127.01	USA	2	PrefersOppositeSex	ShortTerm	D	180
479	41U	Female	27	157.48	51.71	USA	2	PrefersOppositeSex	LongTerm	D	180
479	41U	Female	27	157.48	51.71	USA	2	PrefersOppositeSex	ShortTerm	B	170
480	42U	Female	50	167.64	131.54	USA	2	PrefersOppositeSex	LongTerm	E	185
480	42U	Female	50	167.64	131.54	USA	2	PrefersOppositeSex	ShortTerm	E	185
481	43U	Female	28	170.18	55.34	USA	2	PrefersOppositeSex	LongTerm	E	185
481	43U	Female	28	170.18	55.34	USA	2	PrefersOppositeSex	ShortTerm	E	185
482	45U	Female	38	167.64	111.13	USA	2	PrefersOppositeSex	LongTerm	E	185
482	45U	Female	38	167.64	111.13	USA	2	PrefersOppositeSex	ShortTerm	E	185
483	46U	Female	53	162.56	63.5	USA	2	PrefersOppositeSex	LongTerm	C	175
483	46U	Female	53	162.56	63.5	USA	2	PrefersOppositeSex	ShortTerm	E	185
484	49U	Female	77	187.96	79.38	USA	2	PrefersOppositeSex	LongTerm	E	185
484	49U	Female	77	187.96	79.38	USA	2	PrefersOppositeSex	ShortTerm	E	185
485	52U	Female	48	157.48	77.11	USA	2	PrefersOppositeSex	LongTerm	D	180
485	52U	Female	48	157.48	77.11	USA	2	PrefersOppositeSex	ShortTerm	E	185
486	54U	Female	34	175.26	97.52	USA	2	PrefersOppositeSex	LongTerm	E	185
486	54U	Female	34	175.26	97.52	USA	2	PrefersOppositeSex	ShortTerm	E	185
487	56U	Female	24	149.86	60.33	USA	2	PrefersOppositeSex	LongTerm	E	185
487	56U	Female	24	149.86	60.33	USA	2	PrefersOppositeSex	ShortTerm	E	185
488	57U	Female	29	167.64	56.7	USA	2	PrefersOppositeSex	LongTerm	D	180
488	57U	Female	29	167.64	56.7	USA	2	PrefersOppositeSex	ShortTerm	E	185
489	58U	Female	35	157.48	71.67	USA	2	PrefersOppositeSex	LongTerm	C	175
489	58U	Female	35	157.48	71.67	USA	2	PrefersOppositeSex	ShortTerm	B	170
490	59U	Female	32	175.26	70.31	USA	2	PrefersOppositeSex	LongTerm	E	185
490	59U	Female	32	175.26	70.31	USA	2	PrefersOppositeSex	ShortTerm	E	185
491	60U	Female	54	175.26	83.91	USA	2	PrefersOppositeSex	LongTerm	E	185
491	60U	Female	54	175.26	83.91	USA	2	PrefersOppositeSex	ShortTerm	D	180
492	61U	Female	35	162.56	61.23	USA	2	PrefersOppositeSex	LongTerm	D	180
492	61U	Female	35	162.56	61.23	USA	2	PrefersOppositeSex	ShortTerm	D	180
493	64U	Female	28	172.72	79.38	USA	2	PrefersOppositeSex	LongTerm	E	185
493	64U	Female	28	172.72	79.38	USA	2	PrefersOppositeSex	ShortTerm	E	185
494	65U	Female	55	167.64	95.25	USA	2	PrefersOppositeSex	LongTerm	C	175
494	65U	Female	55	167.64	95.25	USA	2	PrefersOppositeSex	ShortTerm	C	175
495	67U	Female	27	162.56	52.16	USA	2	PrefersOppositeSex	LongTerm	D	180
495	67U	Female	27	162.56	52.16	USA	2	PrefersOppositeSex	ShortTerm	D	180
496	68U	Female	29	170.18	65.77	USA	2	PrefersOppositeSex	LongTerm	E	185
496	68U	Female	29	170.18	65.77	USA	2	PrefersOppositeSex	ShortTerm
497	69U	Female	32	162.56	69.85	USA	2	PrefersOppositeSex	LongTerm	E	185
497	69U	Female	32	162.56	69.85	USA	2	PrefersOppositeSex	ShortTerm	D	180
498	71U	Female	27	160.02	65.77	USA	2	PrefersOppositeSex	LongTerm	E	185
498	71U	Female	27	160.02	65.77	USA	2	PrefersOppositeSex	ShortTerm	E	185
499	72U	Female	22	154.94	46.72	USA	2	PrefersOppositeSex	LongTerm	C	175
499	72U	Female	22	154.94	46.72	USA	2	PrefersOppositeSex	ShortTerm	D	180
500	74U	Female	21	165.1	90.72	USA	2	PrefersOppositeSex	LongTerm	D	180
500	74U	Female	21	165.1	90.72	USA	2	PrefersOppositeSex	ShortTerm	C	175
501	76U	Female	60	157.48	102.06	USA	2	PrefersOppositeSex	LongTerm	D	180
501	76U	Female	60	157.48	102.06	USA	2	PrefersOppositeSex	ShortTerm	D	180
502	77U	Female	24	165.1	149.69	USA	2	PrefersOppositeSex	LongTerm	C	175
502	77U	Female	24	165.1	149.69	USA	2	PrefersOppositeSex	ShortTerm	D	180
503	78U	Female	25	170.18	62.6	USA	2	PrefersOppositeSex	LongTerm	D	180
503	78U	Female	25	170.18	62.6	USA	2	PrefersOppositeSex	ShortTerm	E	185
504	80U	Female	33	172.72	68.04	USA	2	PrefersOppositeSex	LongTerm	E	185
504	80U	Female	33	172.72	68.04	USA	2	PrefersOppositeSex	ShortTerm	E	185
505	81U	Female	48	182.88	72.57	USA	2	PrefersOppositeSex	LongTerm	E	185
505	81U	Female	48	182.88	72.57	USA	2	PrefersOppositeSex	ShortTerm	E	185
506	84U	Female	29	149.86	50.8	USA	2	PrefersOppositeSex	LongTerm	A	165
506	84U	Female	29	149.86	50.8	USA	2	PrefersOppositeSex	ShortTerm
507	86U	Female	22	165.1	54.43	USA	2	PrefersOppositeSex	LongTerm	D	180
507	86U	Female	22	165.1	54.43	USA	2	PrefersOppositeSex	ShortTerm	A	165
508	87U	Female	56	165.1	53.52	USA	2	PrefersOppositeSex	LongTerm	E	185
508	87U	Female	56	165.1	53.52	USA	2	PrefersOppositeSex	ShortTerm	E	185
509	89U	Female	24	167.64	56.7	USA	2	PrefersOppositeSex	LongTerm	E	185
509	89U	Female	24	167.64	56.7	USA	2	PrefersOppositeSex	ShortTerm	E	185
510	90U	Female	24	162.56	58.06	USA	2	PrefersOppositeSex	LongTerm	C	175
510	90U	Female	24	162.56	58.06	USA	2	PrefersOppositeSex	ShortTerm	C	175
511	91U	Female	33	160.02	49.9	USA	2	PrefersOppositeSex	LongTerm	C	175
511	91U	Female	33	160.02	49.9	USA	2	PrefersOppositeSex	ShortTerm	C	175
512	92U	Female	53	157.48	79.38	USA	2	PrefersOppositeSex	LongTerm	E	185
512	92U	Female	53	157.48	79.38	USA	2	PrefersOppositeSex	ShortTerm	E	185
513	93U	Female	57	162.56	68.04	USA	2	PrefersOppositeSex	LongTerm	D	180
513	93U	Female	57	162.56	68.04	USA	2	PrefersOppositeSex	ShortTerm	D	180
514	94U	Female	53	165.1	72.57	USA	2	PrefersOppositeSex	LongTerm	E	185
514	94U	Female	53	165.1	72.57	USA	2	PrefersOppositeSex	ShortTerm	B	170
515	95U	Female	46	162.56	57.15	USA	2	PrefersOppositeSex	LongTerm	C	175
515	95U	Female	46	162.56	57.15	USA	2	PrefersOppositeSex	ShortTerm	C	175
516	96U	Female	28	165.1	63.5	USA	2	PrefersOppositeSex	LongTerm	C	175
516	96U	Female	28	165.1	63.5	USA	2	PrefersOppositeSex	ShortTerm	C	175
517	97U	Female	32	167.64	54.43	USA	2	PrefersOppositeSex	LongTerm	E	185
517	97U	Female	32	167.64	54.43	USA	2	PrefersOppositeSex	ShortTerm	E	185
518	98U	Female	48	165.1	75.75	USA	2	PrefersOppositeSex	LongTerm	C	175
518	98U	Female	48	165.1	75.75	USA	2	PrefersOppositeSex	ShortTerm	D	180
519	99U	Female	32	165.1	74.84	USA	2	PrefersOppositeSex	LongTerm	D	180
519	99U	Female	32	165.1	74.84	USA	2	PrefersOppositeSex	ShortTerm	E	185
520	100U	Female	34	167.64	62.14	USA	2	PrefersOppositeSex	LongTerm	D	180
520	100U	Female	34	167.64	62.14	USA	2	PrefersOppositeSex	ShortTerm	E	185
521	104U	Female	32	160.02	56.7	USA	2	PrefersOppositeSex	LongTerm	E	185
521	104U	Female	32	160.02	56.7	USA	2	PrefersOppositeSex	ShortTerm	E	185
522	106U	Female	23	162.56	54.43	USA	2	PrefersOppositeSex	LongTerm	E	185
522	106U	Female	23	162.56	54.43	USA	2	PrefersOppositeSex	ShortTerm	E	185
523	107U	Female	33	162.56	83.46	USA	2	PrefersOppositeSex	LongTerm	C	175
523	107U	Female	33	162.56	83.46	USA	2	PrefersOppositeSex	ShortTerm	B	170
524	108U	Female	27	162.56	74.84	USA	2	PrefersOppositeSex	LongTerm	E	185
524	108U	Female	27	162.56	74.84	USA	2	PrefersOppositeSex	ShortTerm	E	185
525	109U	Female	58	157.48	90.72	USA	2	PrefersOppositeSex	LongTerm	C	175
525	109U	Female	58	157.48	90.72	USA	2	PrefersOppositeSex	ShortTerm	C	175
526	111U	Female	21	154.94	56.7	USA	2	PrefersOppositeSex	LongTerm	C	175
526	111U	Female	21	154.94	56.7	USA	2	PrefersOppositeSex	ShortTerm	C	175
527	19U	Female	28	160.02	104.33	USA	2	PrefersSameSex	LongTerm	B	158
527	19U	Female	28	160.02	104.33	USA	2	PrefersSameSex	ShortTerm	D	168
528	36U	Female	40	175.26	70.31	USA	2	PrefersSameSex	LongTerm	E	173
528	36U	Female	40	175.26	70.31	USA	2	PrefersSameSex	ShortTerm	E	185
529	50U	Female	22	167.64	70.31	USA	2	PrefersSameSex	LongTerm	D	168
529	50U	Female	22	167.64	70.31	USA	2	PrefersSameSex	ShortTerm	E	173
530	51U	Female	29	172.72	54.43	USA	2	PrefersSameSex	LongTerm	D	168
530	51U	Female	29	172.72	54.43	USA	2	PrefersSameSex	ShortTerm	E	173
531	105U	Female	67	160.02	106.59	USA	2	PrefersSameSex	LongTerm	B	158
531	105U	Female	67	160.02	106.59	USA	2	PrefersSameSex	ShortTerm	B	158
532	26U	Female	52	162.56	106.59	USA	17	PrefersOppositeSex	LongTerm	B	170
532	26U	Female	52	162.56	106.59	USA	17	PrefersOppositeSex	ShortTerm	C	175
533	23U	Female	25	157.48	72.57	USA	13	PrefersOppositeSex	LongTerm	D	180
533	23U	Female	25	157.48	72.57	USA	13	PrefersOppositeSex	ShortTerm	D	180
534	66U	Female	27	157.48	56.7	USA	13	PrefersOppositeSex	LongTerm	D	180
534	66U	Female	27	157.48	56.7	USA	13	PrefersOppositeSex	ShortTerm	E	185
535	1U	Female	54	162.56	49.9	USA	10	PrefersOppositeSex	LongTerm	D	180
535	1U	Female	54	162.56	49.9	USA	10	PrefersOppositeSex	ShortTerm	E	185
536	101U	Female	29	163.83	52.16	USA	37	PrefersOppositeSex	LongTerm
536	101U	Female	29	163.83	52.16	USA	37	PrefersOppositeSex	ShortTerm	D	180
